# Supplementary material for: Convergent origination of a Drosophila-like dosage compensation mechanism in a reptile lineage
Source: PubMed Central journal article supplement — Genome Res. 2017 Dec;27(12):1974–87. doi: 10.1101/gr.223727.117 (PMC5741051; doi:10.1101/gr.223727.117), 2017-12
Supplement: supp_gr.223727.117_Supplemental_Fig_S5.pdf [file supp_gr.223727.117_Supplemental_Fig_S5.pdf]

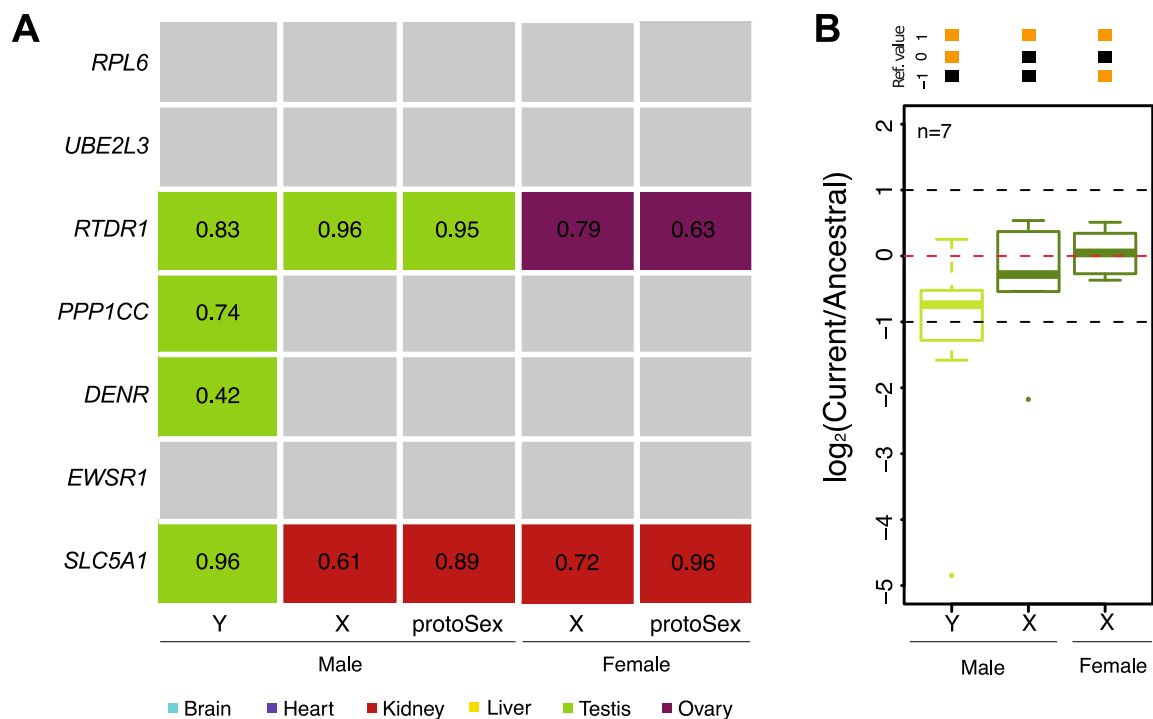

**Supplemental Figure S5. Spatial gene expression patterns and gene expression level conservation of XY gametologs in *Anolis*.** (A) Tissue specificity index (TSI), calculated following a previous procedure (Julien et al. 2012), for four somatic tissues and gonads for XY gametologs and proto-sex chromosomal (protoSex) genes in males and females. Colored squares correspond to genes with high TSI (values above 0.4 are shown). Grey squares correspond to genes with ubiquitous expression across all tissues. (B) Ratio of current expression levels for XY gametologs in males and females compared to the ancestral expression levels. The red dashed line corresponds to a current/ancestral ratio of 0; i.e., a ratio where ancestral gene expression levels have been maintained during evolution. Dashed black lines represent current/ancestral ratios of 1 and -1, indicating a two-fold increase or a two-fold decrease of current gene expression level, respectively. Significant differences (Mann-Whitney *U* test): Benjamin Hochberg-corrected  $P < 0.05$  of XY expression ratios against reference values 1, 0 and -1; orange squares denote significant differences, whereas black squares denote no significant differences. All underlying expression values are calculated as FPKM. Note: ancestral inferred expression output values were calculated per single gene copy/allele.
