# Supplementary material for: Convergent origination of a Drosophila-like dosage compensation mechanism in a reptile lineage
Source: PubMed Central journal article supplement — Genome Res. 2017 Dec;27(12):1974–87. doi: 10.1101/gr.223727.117 (PMC5741051; doi:10.1101/gr.223727.117), 2017-12
Supplement: supp_gr.223727.117_Supplemental_Fig_S6.pdf [file supp_gr.223727.117_Supplemental_Fig_S6.pdf]

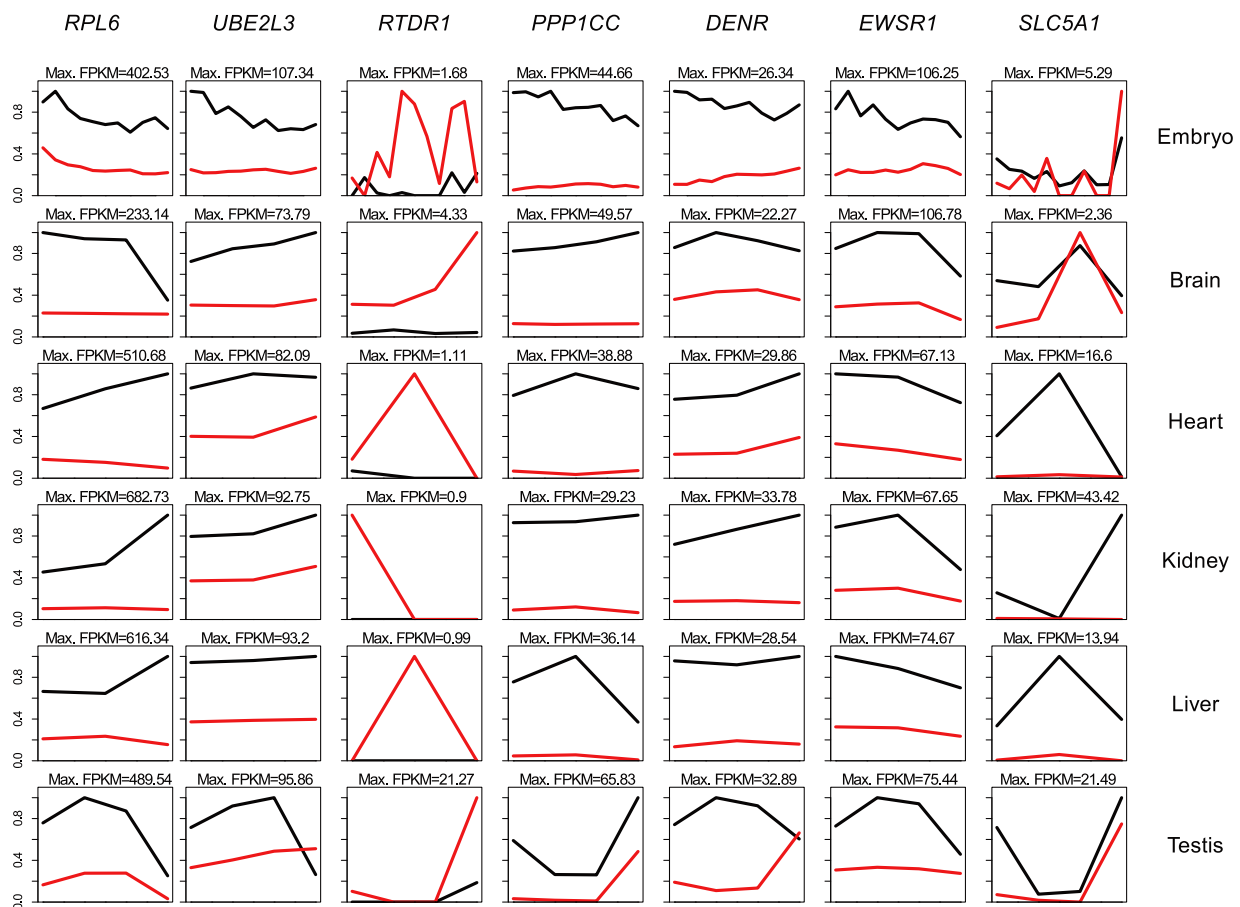

**Supplemental Figure S6. Temporal expression profiles of XY gametologs in Anolis.** Black and red lines represent the expression level of X and Y gametologs, respectively. Each plot shows the expression profile of one X and one Y gametolog in the different organs. Plots for embryos correspond to gene expression profiles in full embryos during developmental stages 2-3, 4-5, 5, 5-6, 6-7, 8, 8-9, 9, 10, 10-11 and 14 (stages as established (Sanger et al. 2008)). Plots for brain and testis show gene expression profiles in these two tissues during developmental stages 13, 15, 16, and in adults. Plots for heart, kidney and liver show gene expression profiles for these three tissues at developmental stages 15, 16, and in adults. Plots have been rescaled for optimal viewing. The corresponding scale (maximum FPKM value) is specified on top of each individual panel.
