# Supplementary material for: Convergent origination of a Drosophila-like dosage compensation mechanism in a reptile lineage
Source: PubMed Central journal article supplement — Genome Res. 2017 Dec;27(12):1974–87. doi: 10.1101/gr.223727.117 (PMC5741051; doi:10.1101/gr.223727.117), 2017-12
Supplement: supp_gr.223727.117_Supplemental_Fig_S7.pdf [file supp_gr.223727.117_Supplemental_Fig_S7.pdf]

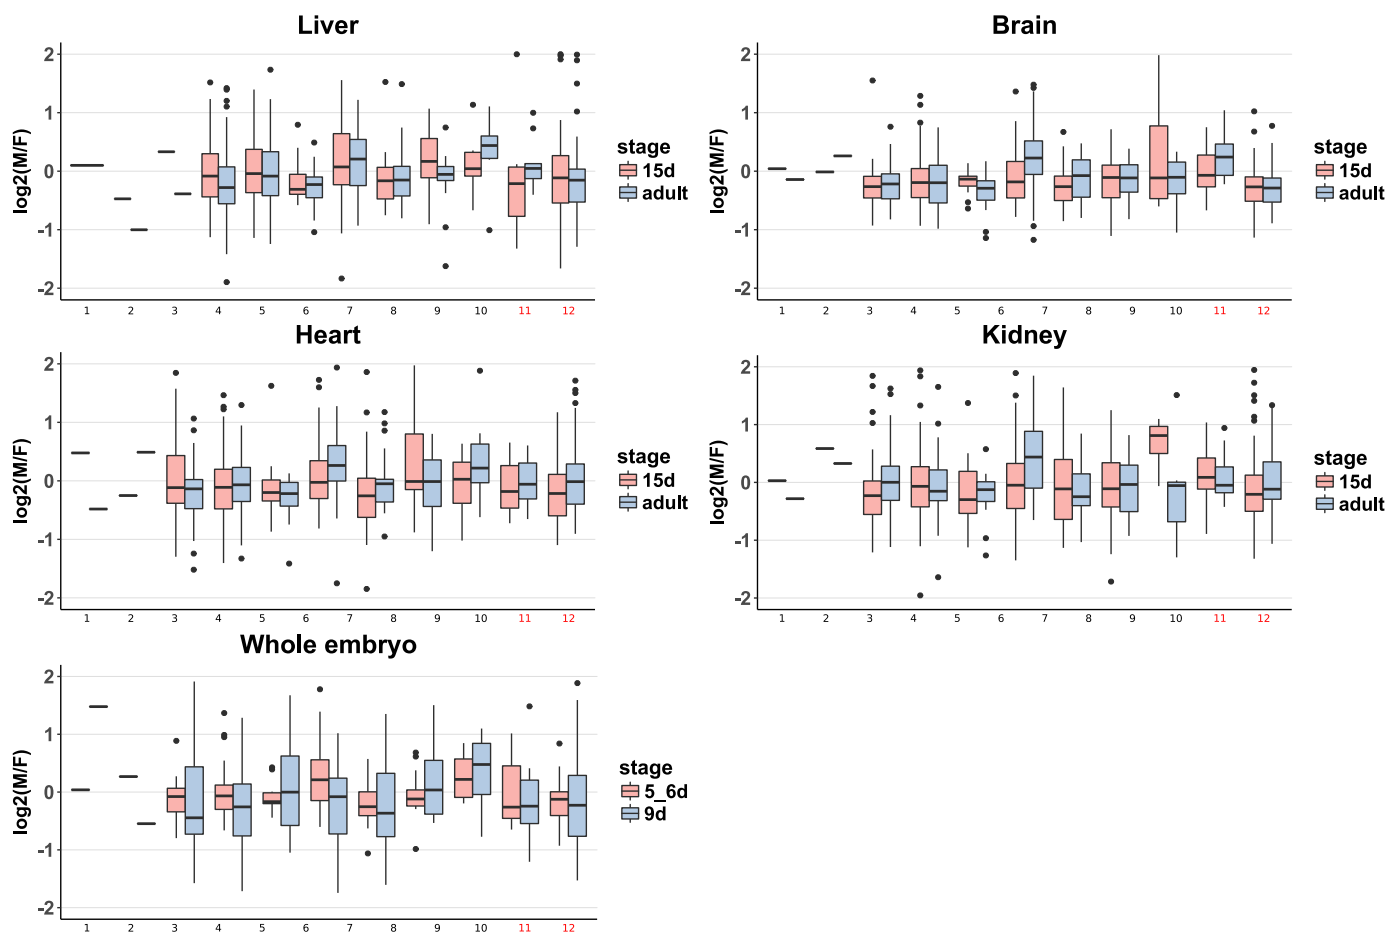

**Supplemental Figure S7. Male-to female  $\log_2$ -gene expression ratio for X-linked contigs.** Contigs GL343947.1 (11) and LGb (12) do not show higher M:F ratio than other contigs in any of the analyzed tissue/stage, contrary to what was previously proposed (Rupp et al. 2017). Numbers on the X-axis indicate the different contigs, as previously defined (Alfoldi et al. 2011): 1 = AAWZ02038267, 2 = AAWZ02041083, 3 = AAWZ02038845, 4 = GL343282.1, 5 = GL343338.1, 6 = GL343364.1, 7 = GL343417.1, 8 = GL343423.1, 9 = GL343550.1, 10 = GL343913.1, 11 = GL343947.1, 12 = LGb.
