# Supplementary material for: Convergent origination of a Drosophila-like dosage compensation mechanism in a reptile lineage
Source: PubMed Central journal article supplement — Genome Res. 2017 Dec;27(12):1974–87. doi: 10.1101/gr.223727.117 (PMC5741051; doi:10.1101/gr.223727.117), 2017-12
Supplement: supp_gr.223727.117_Supplemental_Fig_S9.pdf [file supp_gr.223727.117_Supplemental_Fig_S9.pdf]

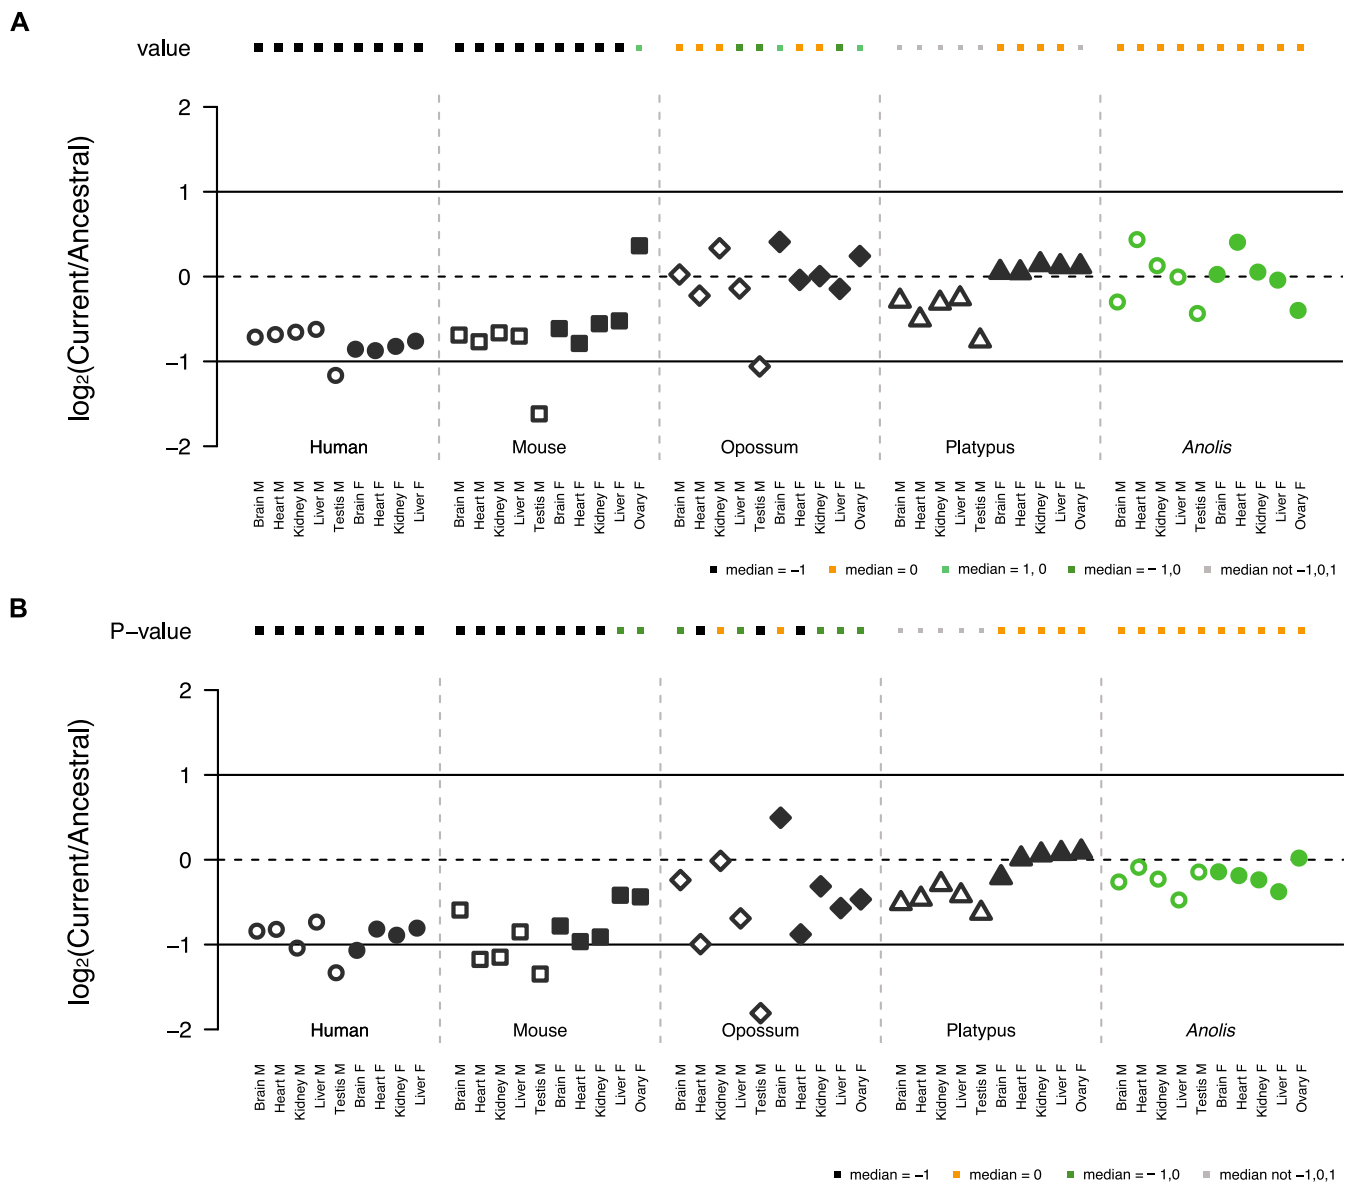

**Supplemental Figure S9. Expression level evolution of X-linked genes in amniotes with different outgroup species.** (A) Ratios of current expression levels of X-linked genes (median value) and ancestral expression levels (median value) using *Xenopus* as sole outgroup species (note: in Figure 3 median values of multiple outgroup species were used to calculate the ancestral expression levels, which makes ancestral expression level estimation more robust). (B) Similar analyses displayed as in A, but using chicken as sole outgroup species. See legend of main Figure 3 for details regarding symbols and statistical tests.
