# Supplementary material for: Convergent origination of a Drosophila-like dosage compensation mechanism in a reptile lineage
Source: PubMed Central journal article supplement — Genome Res. 2017 Dec;27(12):1974–87. doi: 10.1101/gr.223727.117 (PMC5741051; doi:10.1101/gr.223727.117), 2017-12
Supplement: supp_gr.223727.117_Supplemental_Fig_S11.pdf [file supp_gr.223727.117_Supplemental_Fig_S11.pdf]

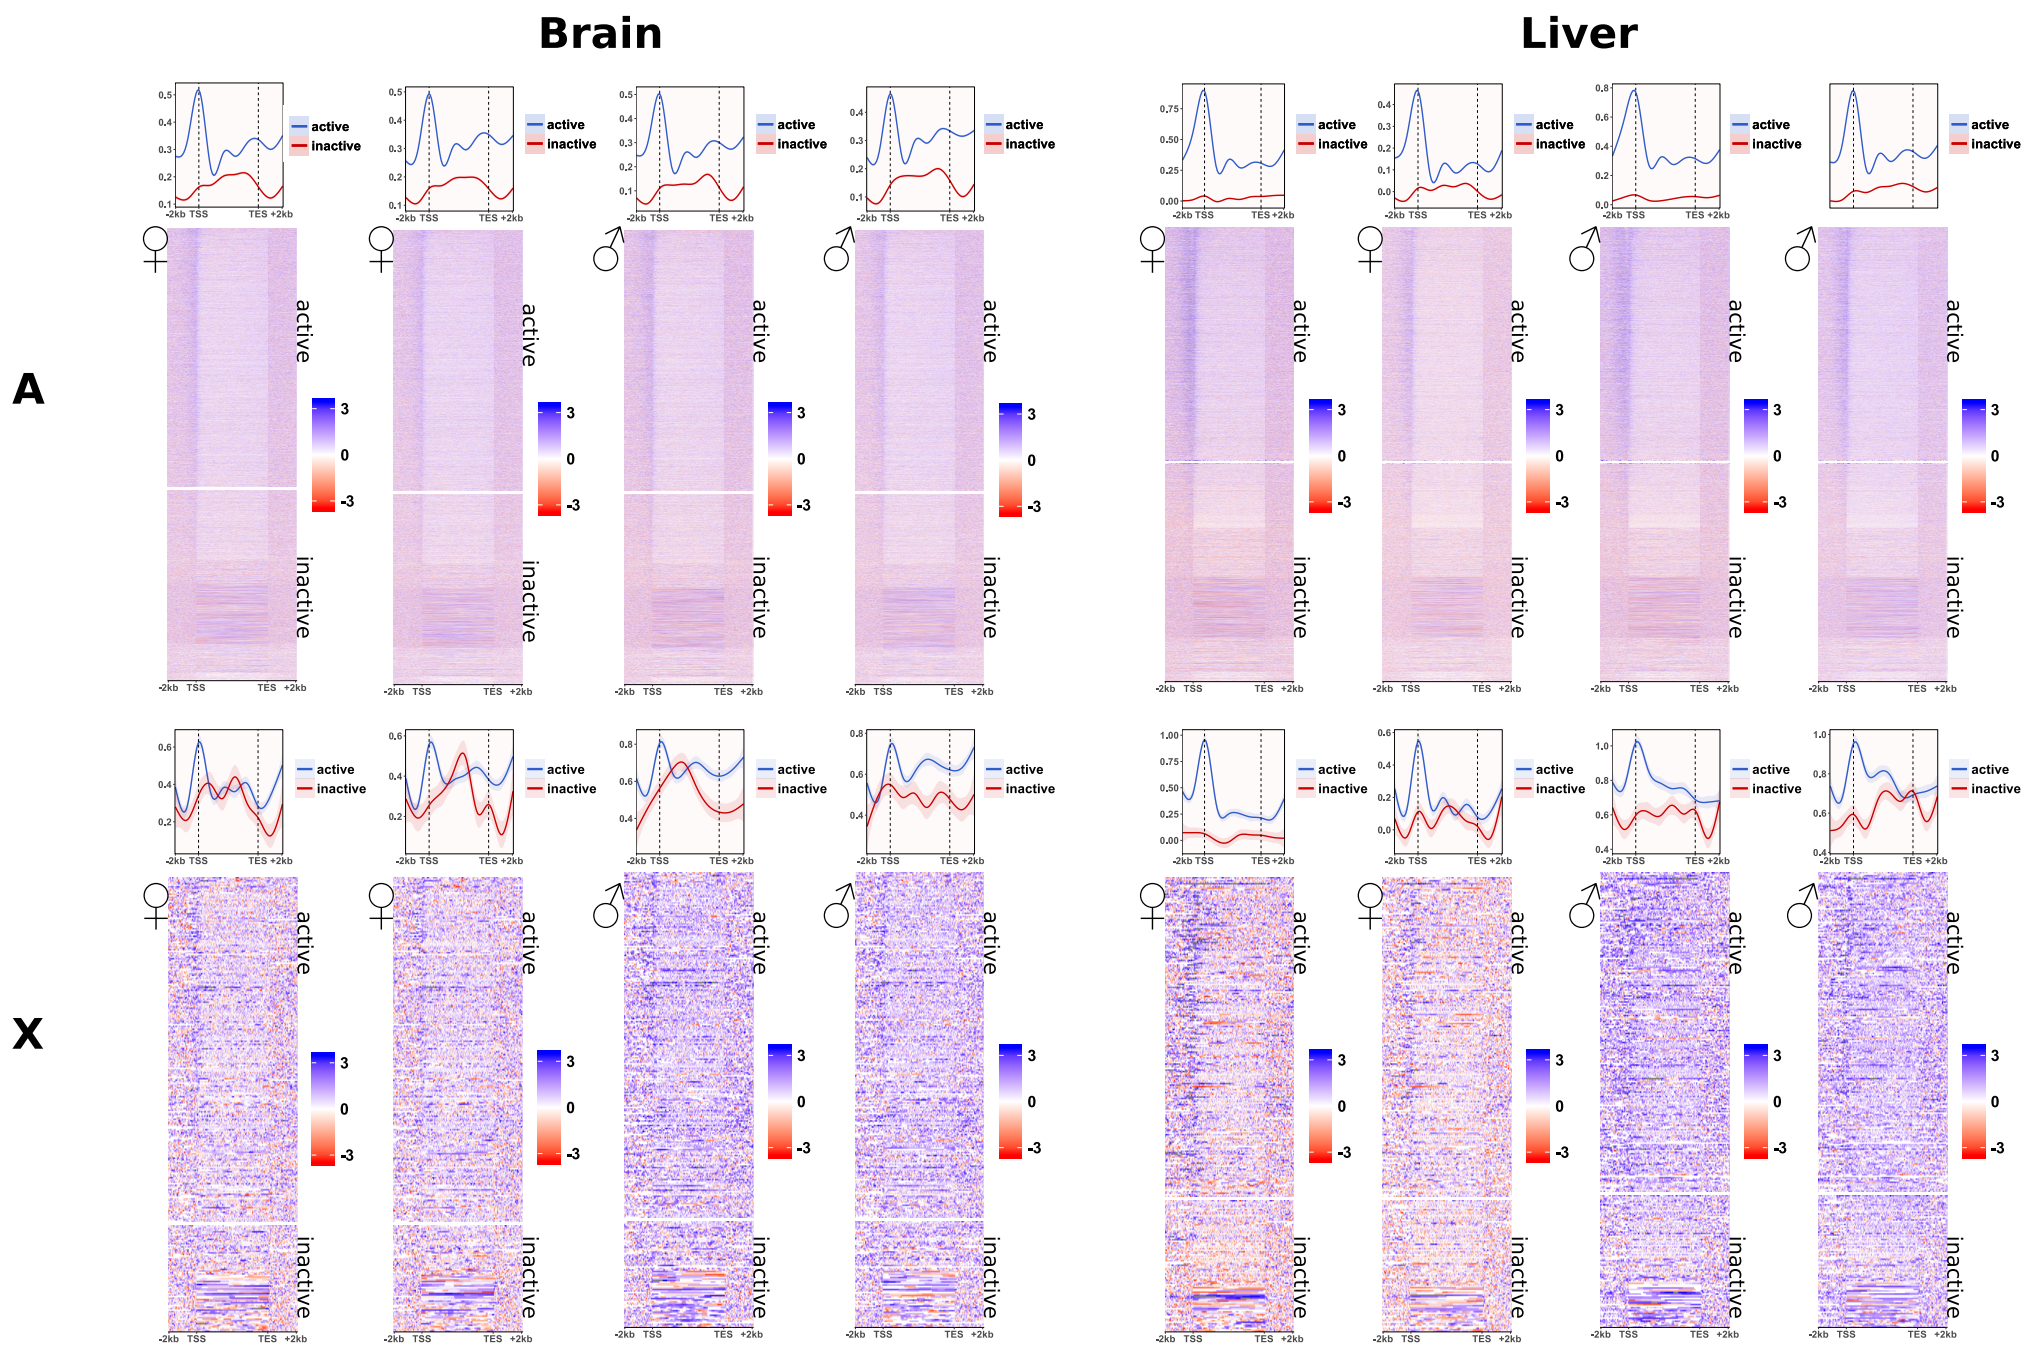

**Supplemental Figure S11. H4K16ac domains with signal peaks at transcriptional start sites.** Heatmaps and median profile plots reported for all samples and for X and autosomes separately (see legend of Figure 5 for details).
