# Supplementary material for: Convergent origination of a Drosophila-like dosage compensation mechanism in a reptile lineage
Source: PubMed Central journal article supplement — Genome Res. 2017 Dec;27(12):1974–87. doi: 10.1101/gr.223727.117 (PMC5741051; doi:10.1101/gr.223727.117), 2017-12
Supplement: supp_gr.223727.117_Supplemental_Fig_S12.pdf [file supp_gr.223727.117_Supplemental_Fig_S12.pdf]

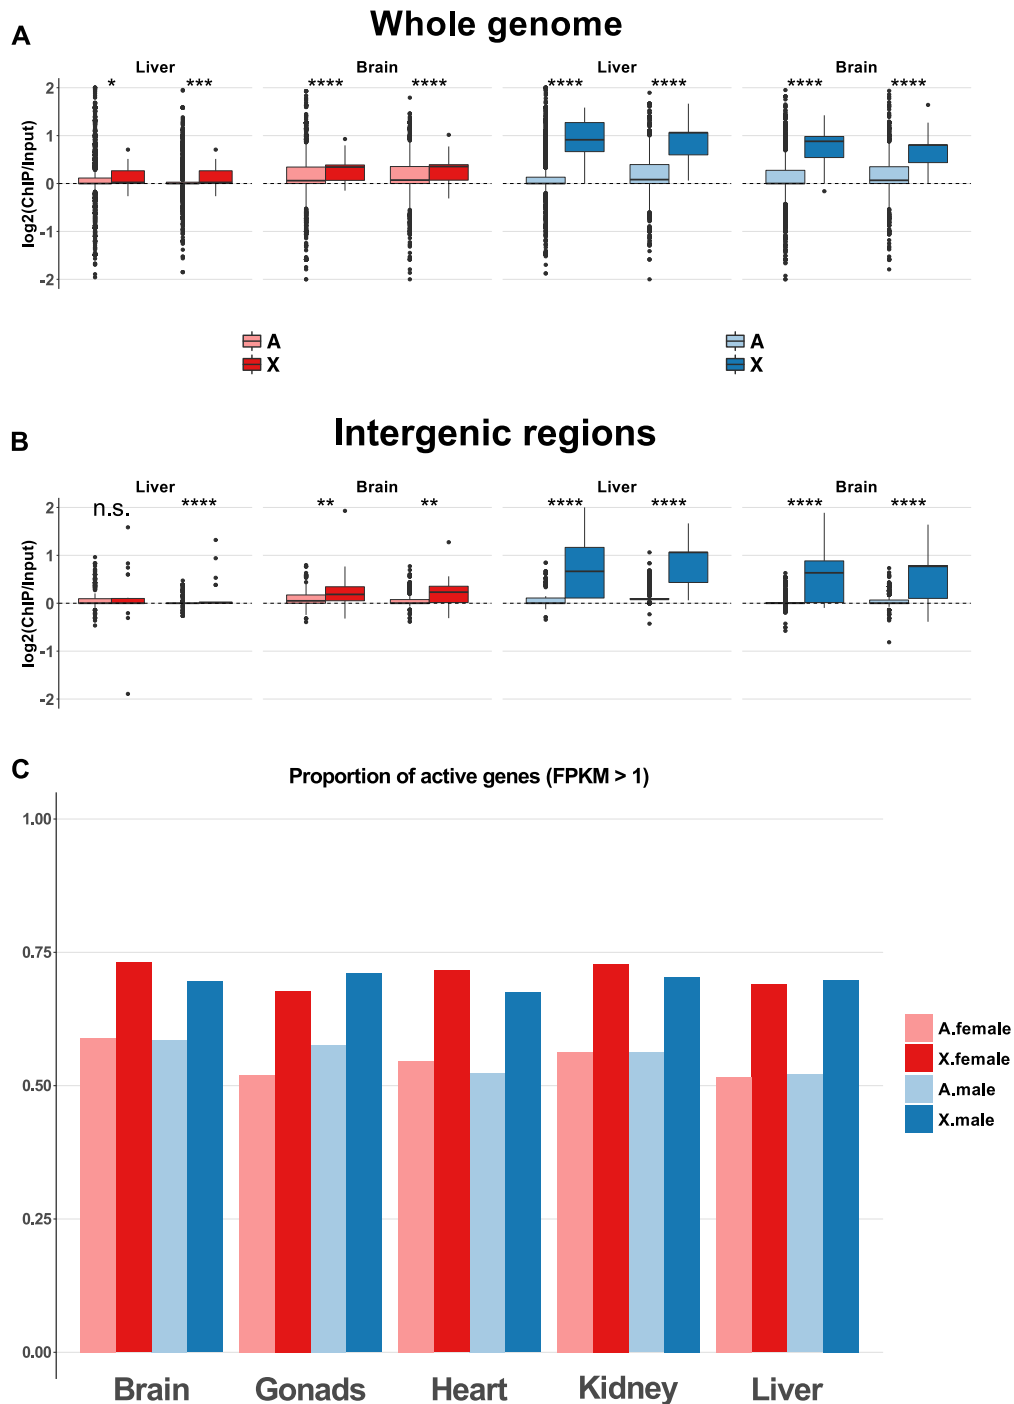

**Supplemental Figure S12. X and autosome comparisons: H4K16ac enrichment, proportion of inactive genes, and GC content.** (A) Comparisons of H4K16ac levels between autosomes and X chromosomes across the whole genome; and (B) along intergenic regions. (C) Proportion of active genes between X and autosomes: X chromosomes display a higher fraction of active genes for all analyzed tissues.
