# Supplementary material for: Convergent origination of a Drosophila-like dosage compensation mechanism in a reptile lineage
Source: PubMed Central journal article supplement — Genome Res. 2017 Dec;27(12):1974–87. doi: 10.1101/gr.223727.117 (PMC5741051; doi:10.1101/gr.223727.117), 2017-12
Supplement: supp_gr.223727.117_Supplemental_Fig_S13.pdf [file supp_gr.223727.117_Supplemental_Fig_S13.pdf]

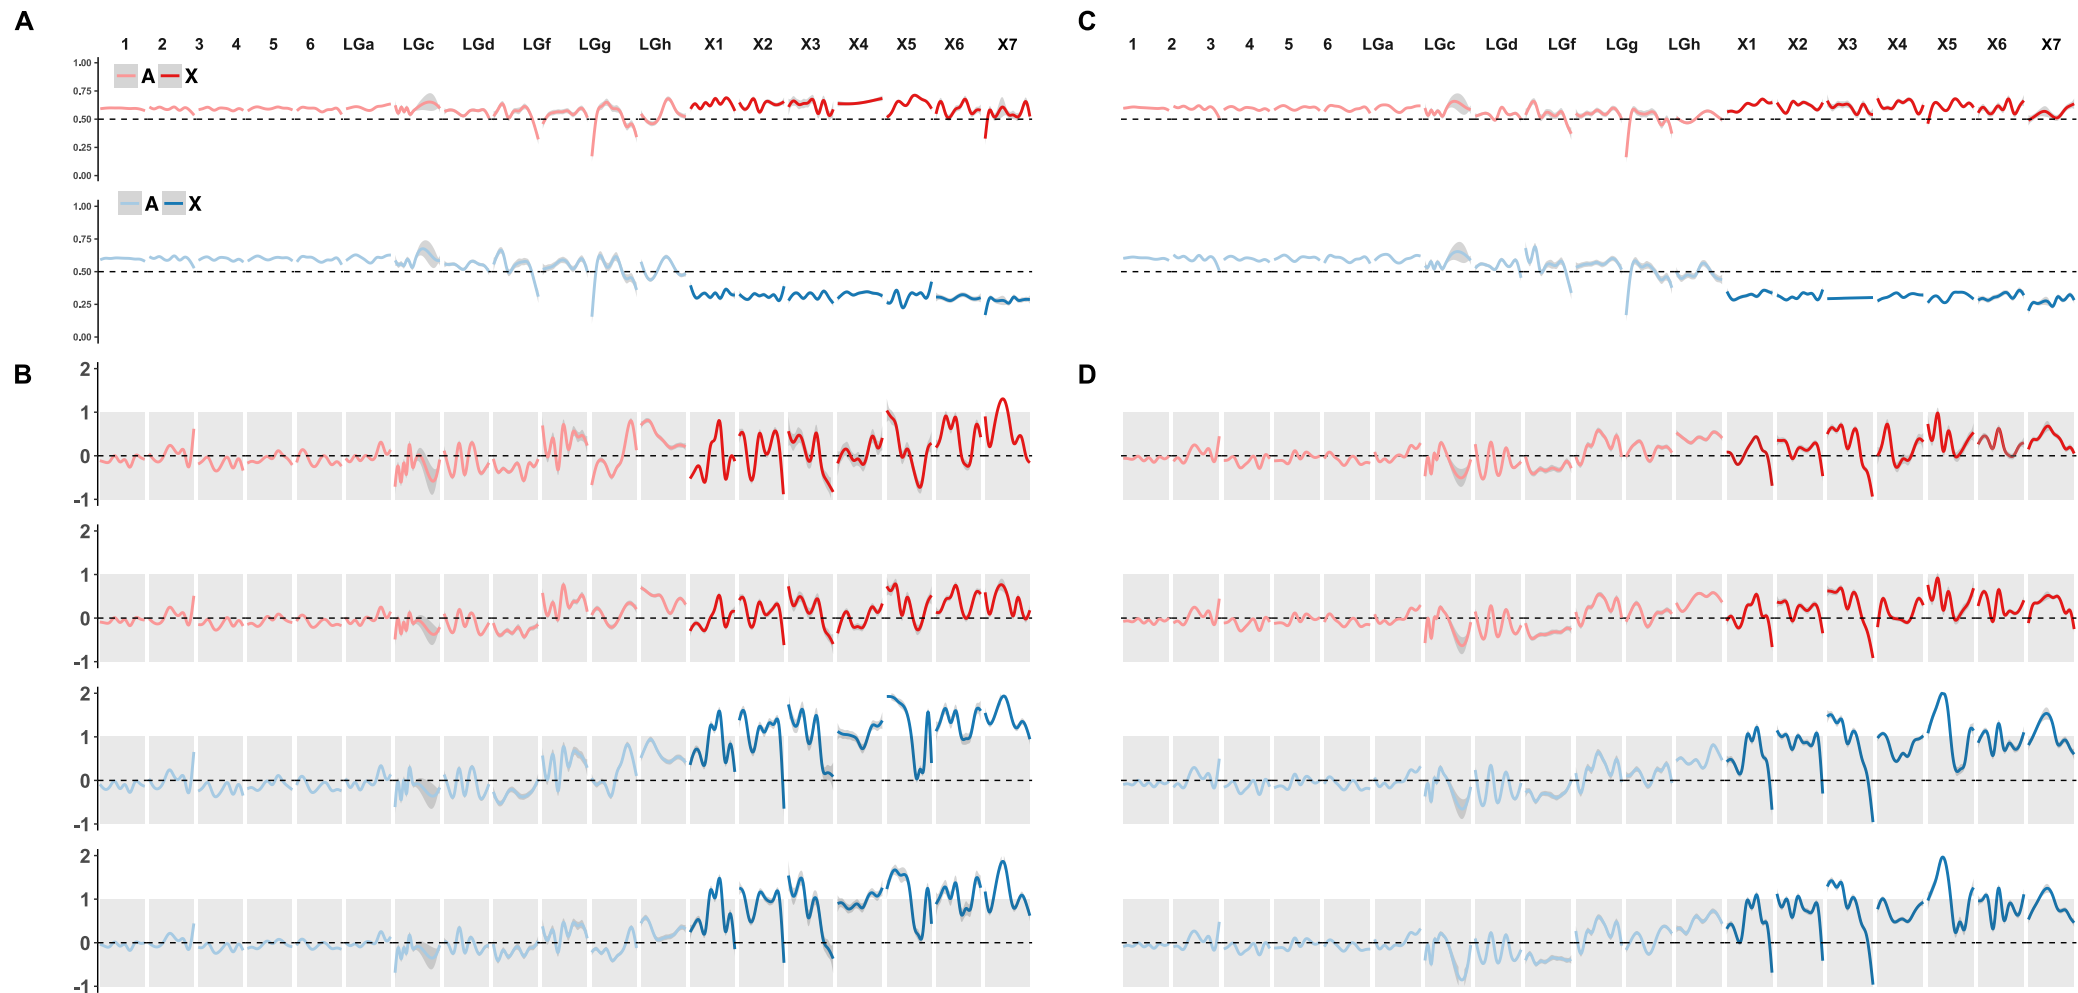

**Supplemental Figure S13. Genome-wide ChIP-seq data profiles along autosomes and X-linked contigs (all samples).** (A) Input liver; (B) H4K16ac liver; (C) input brain; (D) H4K16ac brain. Red = female, blue = male. X1 = LGb, X2 = GL343282.1, X3 = GL343338.1, X4 = GL343364.1, X5 = GL343417.1, X6 = GL343423.1, X7 = GL343550.1.
