# Supplementary material for: Convergent origination of a Drosophila-like dosage compensation mechanism in a reptile lineage
Source: PubMed Central journal article supplement — Genome Res. 2017 Dec;27(12):1974–87. doi: 10.1101/gr.223727.117 (PMC5741051; doi:10.1101/gr.223727.117), 2017-12
Supplement: supp_gr.223727.117_Supplemental_Fig_S14.pdf [file supp_gr.223727.117_Supplemental_Fig_S14.pdf]

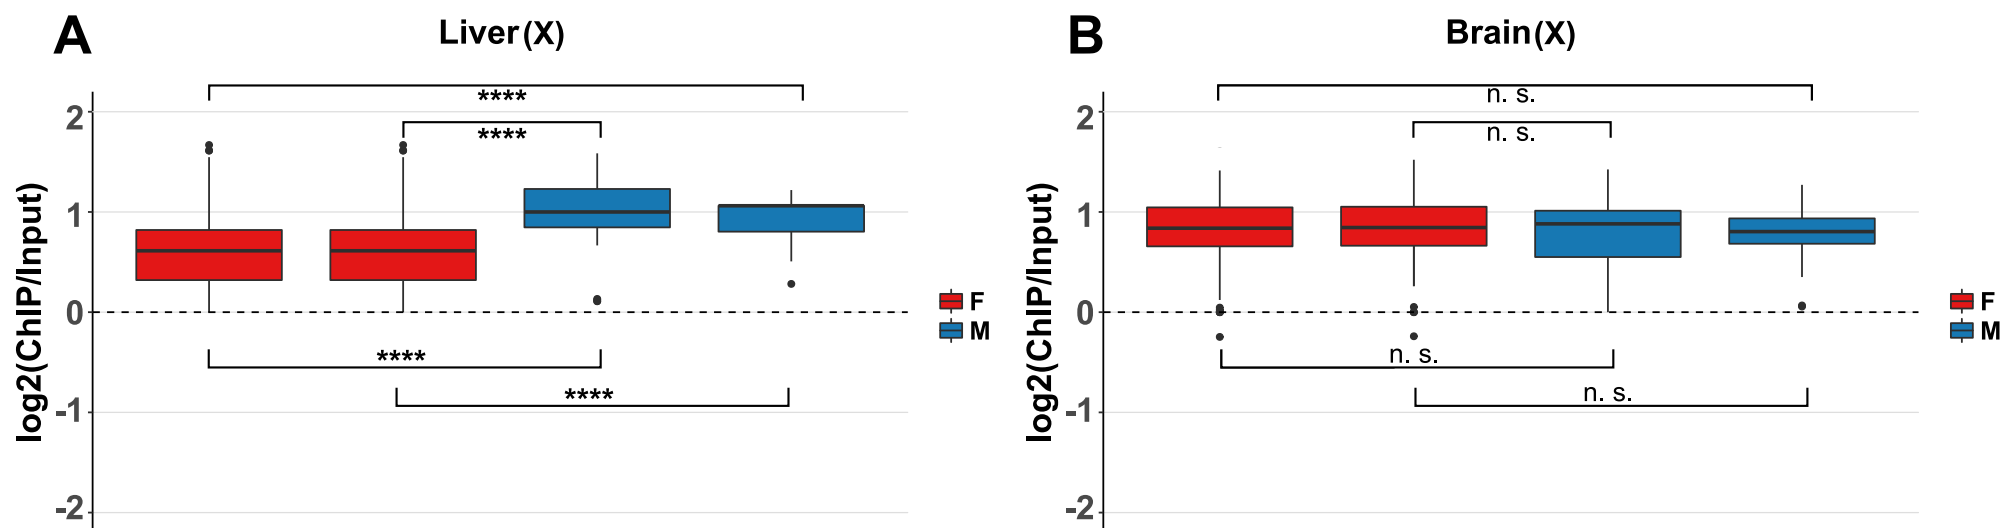

**Supplemental Figure S14. Comparisons of H4K16ac enrichment levels on the X chromosome.** Comparison of H4K16ac enrichment levels on genic regions of the X chromosome between males (actual levels; see figure 6B) and females (using half of the reads mapping to input) for liver (A) and brain (B). Mann-Whitney  $U$  test with FDR correction. \*\*\*\*:  $P \leq 10^{-5}$ ; n.s.:  $P > 0.05$ . F=Female M=Male.
