# Supplementary material for: Convergent origination of a Drosophila-like dosage compensation mechanism in a reptile lineage
Source: PubMed Central journal article supplement — Genome Res. 2017 Dec;27(12):1974–87. doi: 10.1101/gr.223727.117 (PMC5741051; doi:10.1101/gr.223727.117), 2017-12
Supplement: supp_gr.223727.117_Supplemental_Fig_S15.pdf [file supp_gr.223727.117_Supplemental_Fig_S15.pdf]

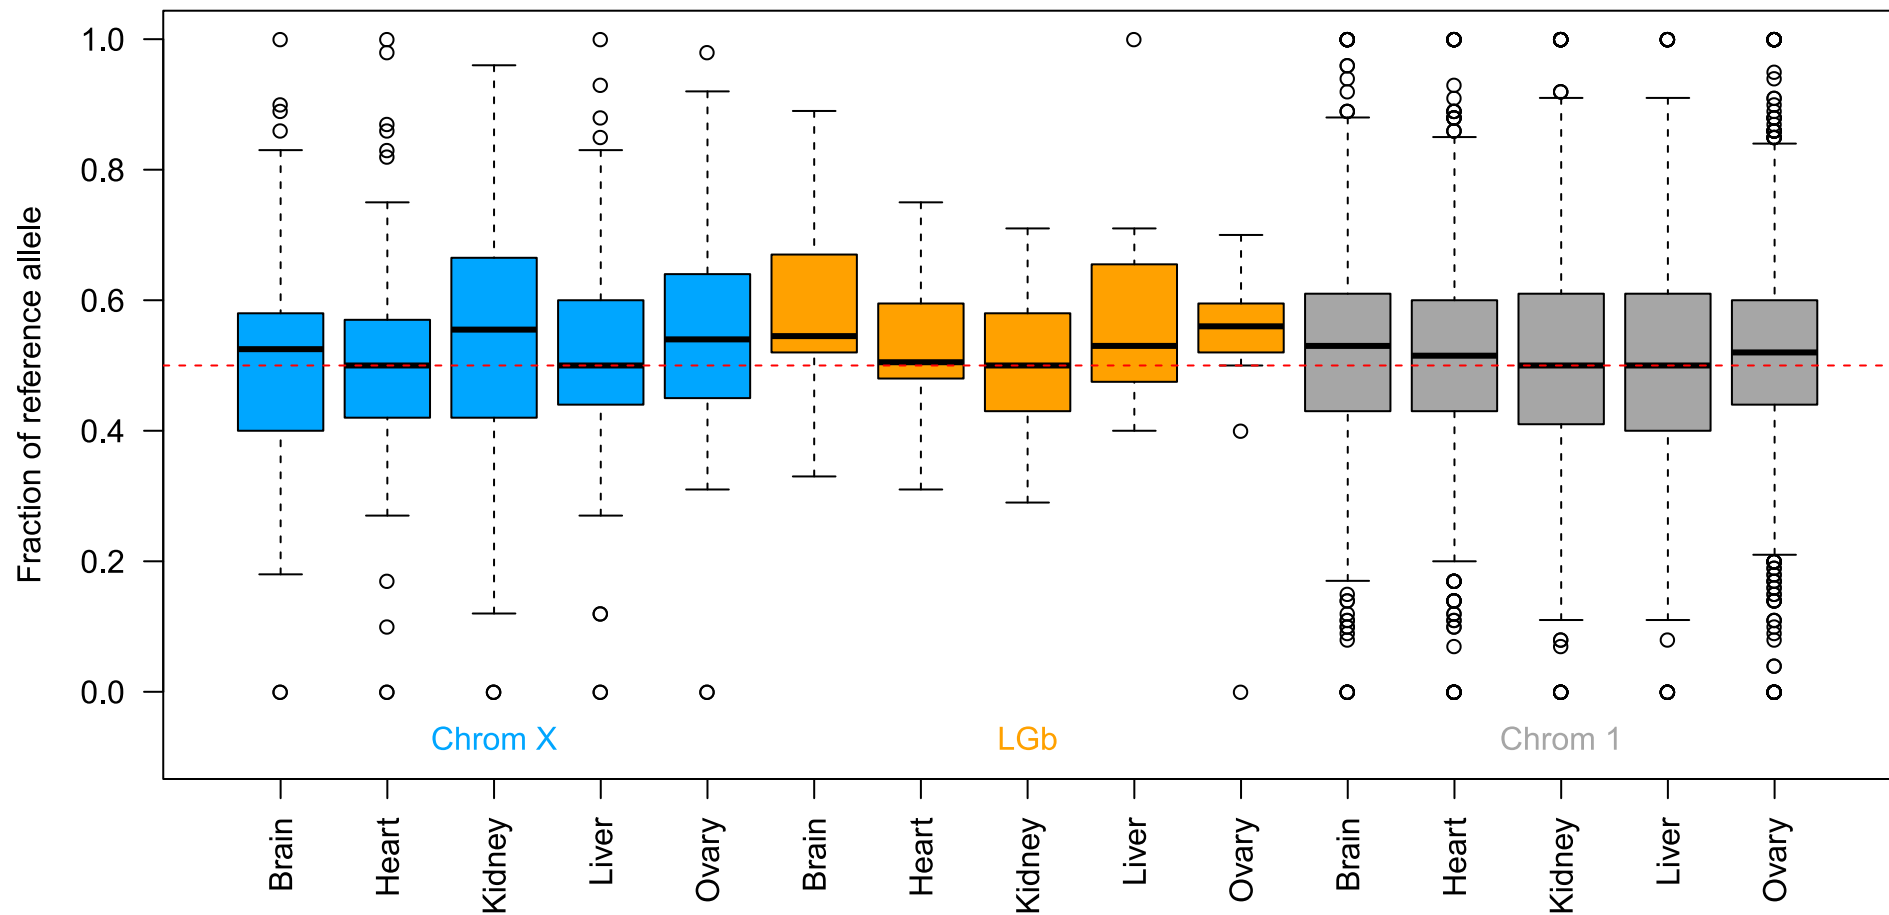

**Supplemental Figure S15. Allelic expression for bulk-tissue data (RNA-Seq).** Distribution of allelic frequencies in one *Anolis* female for five tissues in the whole chromosome X and in scaffold LGb (the only scaffold identified as X-linked at the time of the genome publication). Allelic distributions in chromosome 1 are shown as a control. SNPs detected in female X chromosome = 2511; SNPs detected in X chromosome exons = 113; SNPs covered by RNA-Seq reads in: brain = 60, heart = 65, kidney = 56, liver = 46, ovary = 69, all five organs = 86.
