# Supplementary material for: Convergent origination of a Drosophila-like dosage compensation mechanism in a reptile lineage
Source: PubMed Central journal article supplement — Genome Res. 2017 Dec;27(12):1974–87. doi: 10.1101/gr.223727.117 (PMC5741051; doi:10.1101/gr.223727.117), 2017-12
Supplement: supp_gr.223727.117_Supplemental_Fig_S16.pdf [file supp_gr.223727.117_Supplemental_Fig_S16.pdf]

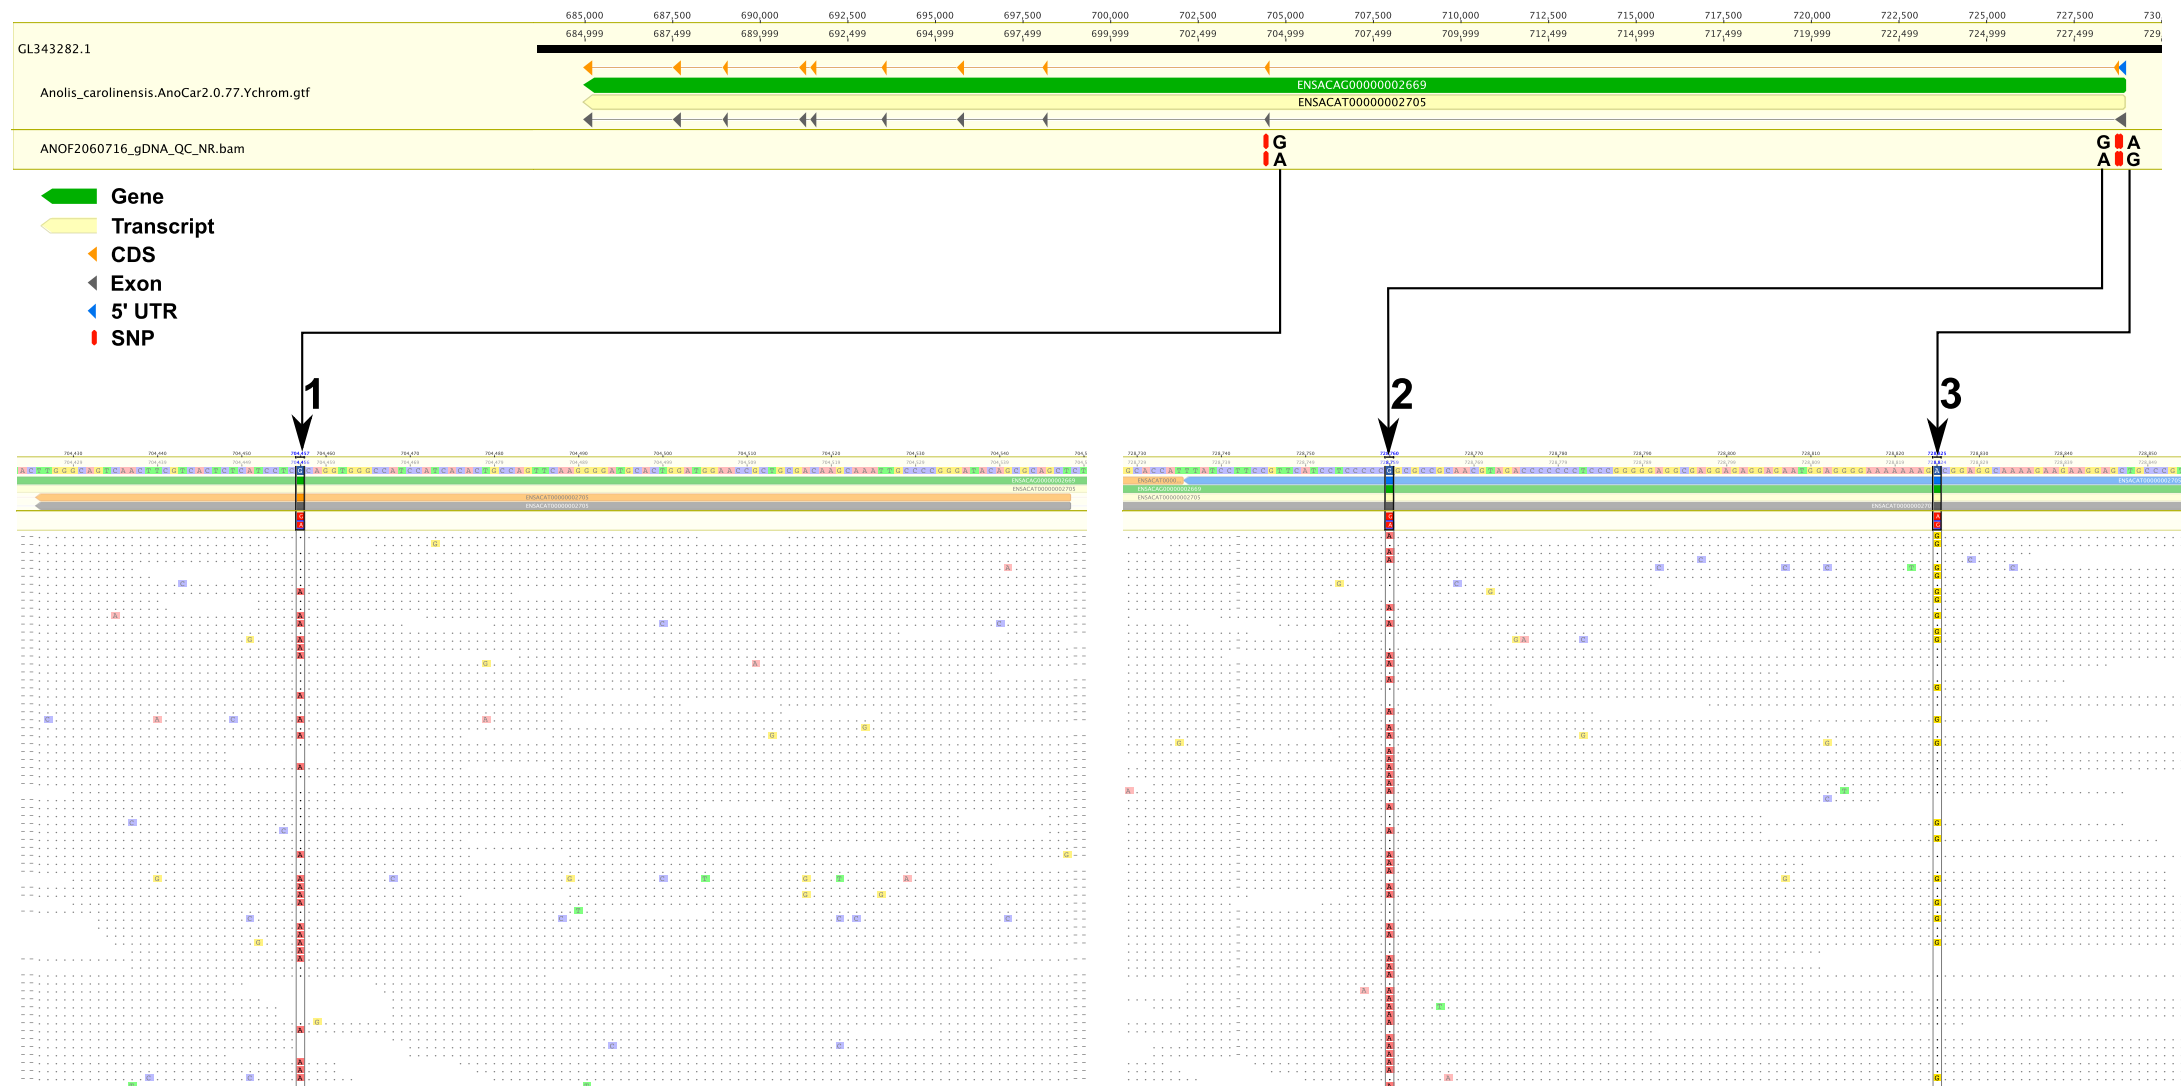

**Supplemental Figure S16. Biallelic expression of a X-linked gene in a single-cell (scRNA-Seq).** Biallelic expression of three heterozygous SNPs in the X-linked gene *DGCR2* (ENSACAG00000002669) in one brain cell of a female specimen. Two SNPs (2, 3) are located in the 5'UTR, a third SNP (1) is present in the coding region of exon 2 (at third codon position).
