# Supplementary material for: Convergent origination of aDrosophila-like dosage compensation mechanism in a reptile lineage
Source: HighWire-hosted journal article supplement (doi:10.1101/gr.223727.117), 2017-11-13
Supplement: Supplemental_Tables_S1-S6.xlsx [file Supplemental_Tables_S1-S6.xlsx]

## Sheet: Supp Table 1
Supplementary Table 1. Summary of data produced in this study.
Species	Data type	No. Individuals	No. Samples	Stage	Organs	Sex
Anolis	RNA-seq*	6	30	Adults	brain, heart, kidney, liver, testis/ovary	Males and Females
Anolis	RNA-seq*	various	48	various developmental stages	brain, heart, kidney, liver, testis/ovary	Males and Females
Anolis	ChIP-seq	2	4	Adults	brain and liver	Males and Females
Anolis	DNA-seq*	4	4	Adults	liver, kidney, fat body	Males and Females
Anolis	Single-cell RNA-seq	1	6 cells	Adults	brain	Males and Females
Human	RNA-seq*	3	12	Adults	brain, heart, kidney, liver, testis/ovary	Males and Females
Mouse	RNA-seq*	4	19	Adults	brain, heart, kidney, liver, testis/ovary	Males and Females
Opossum	RNA-seq*	4	17	Adults	brain, heart, kidney, liver, testis/ovary	Males and Females
Platypus	RNA-seq*	4	20	Adults	brain, heart, kidney, liver, testis/ovary	Males and Females
Chicken	RNA-seq*	4	20	Adults	brain, heart, kidney, liver, testis/ovary	Males and Females
Xenopus	RNA-seq*	4	20	Adults	brain, heart, kidney, liver, testis/ovary	Males and Females
Fiji banded iguana	DNA-seq*	1	1	Adult	liver	Male
*detailed information about all newly generated data is provided in Supplemental Table S2

## Sheet: Supp Table 2
Supplementary Table 2. RNA-seq and genomic data used in this study.
	DNA/RNA	Organ	Sex	Stage	Library	RIN	RQN	Source	Age	Type	Cycle Nb	Read count	% >= Q30 bases	Mean Quality Score	Notes
Anolis
1	RNA	Brain	Female1	Adult	1696sTS		7.9	Michigan State University (Prof. Juli Wade)	adult, breeding season	single read	100	21632296	93.17	36.18
2	RNA	Brain	Female2	Adult	1703sTS		8.1	Michigan State University (Prof. Juli Wade)	adult, breeding season	single read	100	29117617	89.22	35.09
3	RNA	Brain	Female3	Adult	1268sTS		7.8	Michigan State University (Prof. Juli Wade)	adult, breeding season	single read	100	26327473	95.59	36.97
4	RNA	Brain	Male1	Adult	1691sTS		7.9	Michigan State University (Prof. Juli Wade)	adult, breeding season	single read	100	20026314	93.94	36.55
5	RNA	Brain	Male2	Adult	1708sTS		7.9	Michigan State University (Prof. Juli Wade)	adult, breeding season	single read	100	24407832	89.06	35.03
6	RNA	Brain	Male3	Adult	1225sTS		7	Michigan State University (Prof. Juli Wade)	adult, breeding season	single read	100	21751247	95.21	36.8
7	RNA	Heart	Female1	Adult	1697sTS		7.9	Michigan State University (Prof. Juli Wade)	adult, breeding season	single read	100	33937077	93.94	36.52
8	RNA	Heart	Female2	Adult	1704sTS		8.2	Michigan State University (Prof. Juli Wade)	adult, breeding season	single read	100	25013637	89.13	35.04
9	RNA	Heart	Female3	Adult	1269sTS		8.4	Michigan State University (Prof. Juli Wade)	adult, breeding season	single read	100	27566527	95.2	36.78
10	RNA	Heart	Male1	Adult	1692sTS		7.9	Michigan State University (Prof. Juli Wade)	adult, breeding season	single read	100	22168300	93.85	36.49
11	RNA	Heart	Male2	Adult	1709sTS		7.6	Michigan State University (Prof. Juli Wade)	adult, breeding season	single read	100	25737919	89.17	35.05
12	RNA	Heart	Male3	Adult	1271sTS		8.4	Michigan State University (Prof. Juli Wade)	adult, breeding season	single read	100	21544442	95.27	36.8
13	RNA	Kidney	Female1	Adult	1699sTS		8.6	Michigan State University (Prof. Juli Wade)	adult, breeding season	single read	100	21357694	94	36.57
14	RNA	Kidney	Female2	Adult	1706sTS		8.2	Michigan State University (Prof. Juli Wade)	adult, breeding season	single read	100	30785590	89.33	35.12
15	RNA	Kidney	Female3	Adult	1267sTS		7.5	Michigan State University (Prof. Juli Wade)	adult, breeding season	single read	100	27082741	95.73	95.73
16	RNA	Kidney	Male1	Adult	1694sTS		8.5	Michigan State University (Prof. Juli Wade)	adult, breeding season	single read	100	24167844	94.05	36.58
17	RNA	Kidney	Male2	Adult	1711sTS		8	Michigan State University (Prof. Juli Wade)	adult, breeding season	single read	100	27605777	89.22	35.08
18	RNA	Kidney	Male3	Adult	1270sTS		8.5	Michigan State University (Prof. Juli Wade)	adult, breeding season	single read	100	21927565	95.15	36.81
19	RNA	Liver	Female1	Adult	1698sTS		8.6	Michigan State University (Prof. Juli Wade)	adult, breeding season	single read	100	16749158	94.19	36.66
20	RNA	Liver	Female2	Adult	1705sTS		8	Michigan State University (Prof. Juli Wade)	adult, breeding season	single read	100	24763352	89.4	35.15
21	RNA	Liver	Female3	Adult	1266sTS		8.1	Michigan State University (Prof. Juli Wade)	adult, breeding season	single read	100	18294723	95.63	37
22	RNA	Liver	Male1	Adult	1693sTS		8.4	Michigan State University (Prof. Juli Wade)	adult, breeding season	single read	100	27956127	93.83	36.53
23	RNA	Liver	Male2	Adult	1710sTS		8.1	Michigan State University (Prof. Juli Wade)	adult, breeding season	single read	100	21423644	89.18	35.09
24	RNA	Liver	Male3	Adult	1272sTS		8.2	Michigan State University (Prof. Juli Wade)	adult, breeding season	single read	100	23691891	94.98	36.71
25	RNA	Ovary	Female1	Adult	1700sTS		8.5	Michigan State University (Prof. Juli Wade)	adult, breeding season	single read	100	26611095	93.7	36.44
26	RNA	Ovary	Female2	Adult	1707sTS		8.6	Michigan State University (Prof. Juli Wade)	adult, breeding season	single read	100	28023350	88.66	34.9
27	RNA	Ovary	Female3	Adult	1288sTS		9.4	Michigan State University (Prof. Juli Wade)	adult, breeding season	single read	100	43061562	93.5	36.55
28	RNA	Testis	Male1	Adult	1695sTS		8.7	Michigan State University (Prof. Juli Wade)	adult, breeding season	single read	100	21914523	93.76	36.48
29	RNA	Testis	Male2	Adult	1712sTS		8.6	Michigan State University (Prof. Juli Wade)	adult, breeding season	single read	100	27673400	88.66	34.91
30	RNA	Testis	Male4	Adult	1282sTS		8.3	Michigan State University (Prof. Juli Wade)	adult, breeding season	single read	100	41882223	93.54	36.6
31	RNA	Embryo	Male1	stage 2-3	2763sTS		9.3	Patrick Tshopp, Harvard Medical School	stage 2-3	single read	100	25628007	94.46	36.66
32	RNA	Embryo	Male1	stage 4-5	2775sTS		9.2	Patrick Tshopp, Harvard Medical School	stage 4-5	single read	100	31204669	94.28	36.59
33	RNA	Embryo	Male1	stage 5	2774sTS		9.2	Patrick Tshopp, Harvard Medical School	stage 5	single read	100	38246246	93.75	36.45
34	RNA	Embryo	Male2	stage 5	2786sTS		9.1	Patrick Tshopp, Harvard Medical School	stage 5	single read	100	25114158	94.68	36.73
35	RNA	Embryo	Female1	stage 5-6	2787sTS		9.2	Patrick Tshopp, Harvard Medical School	stage 5-6	single read	100	29857920	95.47	36.94
36	RNA	Embryo	Female2	stage 5-6	2788sTS		9.2	Patrick Tshopp, Harvard Medical School	stage 5-6	single read	100	30894041	95.18	36.86
37	RNA	Embryo	Male1	stage 5-6	2773sTS		9.2	Patrick Tshopp, Harvard Medical School	stage 5-6	single read	100	42895742	93.9	36.5
38	RNA	Embryo	Male2	stage 5-6	2789sTS		9.2	Patrick Tshopp, Harvard Medical School	stage 5-6	single read	100	33269451	95.57	36.98
39	RNA	Embryo	Female1	stage 6	2784sTS		9.2	Patrick Tshopp, Harvard Medical School	stage 6	single read	100	29264514	94.57	36.69
40	RNA	Embryo	Male1	stage 6-7	2772sTS		9.1	Patrick Tshopp, Harvard Medical School	stage 6-7	single read	100	31918336	93.61	36.4
41	RNA	Embryo	Male2	stage 6-7	2785sTS		9	Patrick Tshopp, Harvard Medical School	stage 6-7	single read	100	34179102	94.74	36.76
42	RNA	Embryo	Male1	stage 8	2770sTS		8.9	Patrick Tshopp, Harvard Medical School	stage 8	single read	100	35079103	93.76	36.47
43	RNA	Embryo	Male2	stage 8	2771sTS		9.2	Patrick Tshopp, Harvard Medical School	stage 8	single read	100	30213457	93.8	36.46
44	RNA	Embryo	Male3	stage 8	2782sTS		8.9	Patrick Tshopp, Harvard Medical School	stage 8	single read	100	32330703	94.77	36.77
45	RNA	Embryo	Male1	stage 8-9	2783sTS		8.8	Patrick Tshopp, Harvard Medical School	stage 8-9	single read	100	42528550	94.92	36.81
46	RNA	Embryo	Female1	stage 9	2780sTS		8.8	Patrick Tshopp, Harvard Medical School	stage 9	single read	100	26558930	94.12	36.56
47	RNA	Embryo	Male1	stage 9	2769sTS		9.3	Patrick Tshopp, Harvard Medical School	stage 9	single read	100	41014257	93.93	36.52
48	RNA	Embryo	Female1	stage 9-10	2777sTS		9	Patrick Tshopp, Harvard Medical School	stage 9-10	single read	100	34837952	94.27	36.62
49	RNA	Embryo	Male1	stage 10	2779sTS		8.7	Patrick Tshopp, Harvard Medical School	stage 10	single read	100	37848897	94.38	36.64
50	RNA	Embryo	Male1	stage 10-11	2778sTS		9.1	Patrick Tshopp, Harvard Medical School	stage 10-11	single read	100	35698335	94.35	36.63
51	RNA	Embryo	Male2	stage 10-11	2781sTS		8.8	Patrick Tshopp, Harvard Medical School	stage 10-11	single read	100	35853735	94.85	36.8
52	RNA	Embryo	Female1	stage 11	2767sTS		9.2	Patrick Tshopp, Harvard Medical School	stage 11	single read	100	32961934	94.67	94.67
53	RNA	Embryo	Female2	stage 11	2768sTS		9	Patrick Tshopp, Harvard Medical School	stage 11	single read	100	39983140	94.55	36.7
54	RNA	Embryo	Female1	stage 13	2765sTS		8.9	Patrick Tshopp, Harvard Medical School	stage 13	single read	100	24090729	94.38	36.66
55	RNA	Embryo	Female2	stage 13	2766sTS		9.1	Patrick Tshopp, Harvard Medical School	stage 13	single read	100	42788072	94.67	36.74
56	RNA	Embryo	Female3	stage 13	2776sTS		9	Patrick Tshopp, Harvard Medical School	stage 13	single read	100	42063116	94.51	36.7
57	RNA	Brain	Male1	stage 13	2809sTS		8.8	Patrick Tshopp, Harvard Medical School	stage 13	single read	100	28312294	95.88	37.12
58	RNA	Gonads	Male1	stage 13	2810sTS		8.7	Patrick Tshopp, Harvard Medical School	stage 13	single read	100	29295260	95.88	37.09
59	RNA	Embryo	Male1	stage 14	2764sTS		8.9	Patrick Tshopp, Harvard Medical School	stage 14	single read	100	39819547	94.69	36.76
60	RNA	Brain	Female1	stage 15	2794sTS		8.7	Patrick Tshopp, Harvard Medical School	stage 15	single read	100	30388187	95.75	37.06
61	RNA	Gonads	Female1	stage 15	2798sTS		8.1	Patrick Tshopp, Harvard Medical School	stage 15	single read	100	30826677	95.91	37.11
62	RNA	Heart	Female1	stage 15	2795sTS		8.5	Patrick Tshopp, Harvard Medical School	stage 15	single read	100	27370946	95.71	37.03
63	RNA	Kidney	Female1	stage 15	2796sTS		8.5	Patrick Tshopp, Harvard Medical School	stage 15	single read	100	31813664	95.88	37.1
64	RNA	Liver	Female1	stage 15	2797sTS		8.3	Patrick Tshopp, Harvard Medical School	stage 15	single read	100	32213039	96.09	37.19
65	RNA	Brain	Male1	stage 15	2790sTS		8.8	Patrick Tshopp, Harvard Medical School	stage 15	single read	100	33794699	95.61	37.01
66	RNA	Heart	Male1	stage 15	2791sTS		7.8	Patrick Tshopp, Harvard Medical School	stage 15	single read	100	27191046	95.49	36.95
67	RNA	Kidney	Male1	stage 15	2792sTS		8.4	Patrick Tshopp, Harvard Medical School	stage 15	single read	100	29878499	95.78	37.06
68	RNA	Liver	Male1	stage 15	2793sTS		9.2	Patrick Tshopp, Harvard Medical School	stage 15	single read	100	28581339	95.87	37.12
69	RNA	Brain	Male2	stage 15	2804sTS		8.3	Patrick Tshopp, Harvard Medical School	stage 15	single read	100	33867115	95.71	37.04
70	RNA	Gonads	Male2	stage 15	2808sTS		8.8	Patrick Tshopp, Harvard Medical School	stage 15	single read	100	32996336	96.15	37.2
71	RNA	Heart	Male2	stage 15	2805sTS		7.6	Patrick Tshopp, Harvard Medical School	stage 15	single read	100	27737711	95.9	37.09
72	RNA	Kidney	Male2	stage 15	2806sTS		8.8	Patrick Tshopp, Harvard Medical School	stage 15	single read	100	25590706	95.96	37.1
73	RNA	Liver	Male2	stage 15	2807sTS		8.7	Patrick Tshopp, Harvard Medical School	stage 15	single read	100	29316747	95.74	37.05
74	RNA	Brain	Male1	stage 16	2799sTS		8.5	Patrick Tshopp, Harvard Medical School	stage 16	single read	100	37386924	95.66	37.03
75	RNA	Gonads	Male1	stage 16	2803sTS		9.1	Patrick Tshopp, Harvard Medical School	stage 16	single read	100	29794260	95.75	37.08
76	RNA	Heart	Male1	stage 16	2800sTS		8.7	Patrick Tshopp, Harvard Medical School	stage 16	single read	100	26181482	95.49	36.95
77	RNA	Kidney	Male1	stage 16	2801sTS		8.7	Patrick Tshopp, Harvard Medical School	stage 16	single read	100	25271298	95.57	36.98
78	RNA	Liver	Male1	stage 16	2802sTS		8.3	Patrick Tshopp, Harvard Medical School	stage 16	single read	100	30818945	95.75	37.06
Human
1	RNA	Brain	Female1	Adult	2134sTS	5.1		Ambion	30 years	single read	100	31863306	91.86	35.82
2	RNA	Brain	Male1	Adult	2131sTS	7.2		Ambion	30 years	single read	100	46388252	92.25	35.99
3	RNA	Heart	Female1	Adult	872sTS	6.9		Amsbio	57 years	single read	100	28777566	93.53	36.04
4	RNA	Heart	Male1	Adult	2128sTS	6.7		Ambion	21 years	single read	100	44259715	91.5	35.69
5	RNA	Heart	Male2	Adult	362sTS	8.5		Amsbio	29 years	single read	100	47203948	96.33	36.02
6	RNA	Kidney	Female1	Adult	873sTS	8		Amsbio	66 years	single read	100	29452377	94.23	36.29
7	RNA	Kidney	Male1	Adult	614sTS	7.7		Amsbio	26 years	single read	100	36939502	96.3	35.95
8	RNA	Kidney	Male2	Adult	2129sTS	6.3		Ambion	64 years	single read	100	56844574	93.79	35.47
9	RNA	Liver	Female1	Adult	874sTS	6.8		Amsbio	70 years	single read	100	26197711	94.65	36.41
10	RNA	Liver	Male1	Adult	521sTS	7.5		Amsbio	64 years	single read	100	45861554	93.76	35.47
11	RNA	Testis	Male1	Adult	2130sTS	7.1		Ambion	27 years	single read	100	40598108	92.51	36.1
12	RNA	Testis	Male2	Adult	719sTS	7.2		National Disease Research Interchange, USA (NDRI) / Leipzig	51 years	single read	100	49976142	93.34	35.34
Mouse
1	RNA	Brain	Female1	Adult	1948sTS		7.4	JANVIER Lab in France	9 weeks	single read	100	19519743	95.31	36.79	CD-1 (RjOrl:SWISS)
2	RNA	Brain	Female2	Adult	1960sTS		6.3	JANVIER Lab in France	9 weeks	single read	100	26475510	94.89	36.7	CD-1 (RjOrl:SWISS)
3	RNA	Brain	Male1	Adult	1944sTS		7.2	JANVIER Lab in France	9 weeks	single read	100	20425066	95.9	37	CD-1 (RjOrl:SWISS)
4	RNA	Brain	Male2	Adult	1954sTS		7.5	JANVIER Lab in France	9 weeks	single read	100	33768896	94.92	36.7	CD-1 (RjOrl:SWISS)
5	RNA	Heart	Female1	Adult	1950sTS		7.3	JANVIER Lab in France	9 weeks	single read	100	33233041	92.19	35.92	CD-1 (RjOrl:SWISS)
6	RNA	Heart	Female2	Adult	2669sTS		7.4	JANVIER Lab in France	9 weeks	single read	100	56159283	88.35	34.89	CD-1 (RjOrl:SWISS)
7	RNA	Heart	Male1	Adult	1956sTS		6.8	JANVIER Lab in France	9 weeks	single read	100	41056894	89.45	35.17	CD-1 (RjOrl:SWISS)
8	RNA	Heart	Male2	Adult	2663sTS		6.8	JANVIER Lab in France	9 weeks	single read	100	58066902	88.24	34.85	CD-1 (RjOrl:SWISS)
9	RNA	Kidney	Female1	Adult	1951sTS		7.8	JANVIER Lab in France	9 weeks	single read	100	27793971	92.02	35.86	CD-1 (RjOrl:SWISS)
10	RNA	Kidney	Female2	Adult	2665sTS		7.2	JANVIER Lab in France	9 weeks	single read	100	34478096	90.21	34.79	CD-1 (RjOrl:SWISS)
11	RNA	Kidney	Male2	Adult	2664sTS		7.2	JANVIER Lab in France	9 weeks	single read	100	74586163	88.35	34.88	CD-1 (RjOrl:SWISS)
12	RNA	Liver	Female1	Adult	1952sTS		8	JANVIER Lab in France	9 weeks	single read	100	24122997	95.8	37.01	CD-1 (RjOrl:SWISS)
13	RNA	Liver	Female2	Adult	1962sTS		8.2	JANVIER Lab in France	9 weeks	single read	100	19914756	97.01	37.39	CD-1 (RjOrl:SWISS)
14	RNA	Liver	Male1	Adult	1946sTS		7.9	JANVIER Lab in France	9 weeks	single read	100	29472470	95.99	37.14	CD-1 (RjOrl:SWISS)
15	RNA	Liver	Male2	Adult	1958sTS		7.6	JANVIER Lab in France	9 weeks	single read	100	36683243	95.32	36.71	CD-1 (RjOrl:SWISS)
16	RNA	Ovary	Female1	Adult	1953sTS		8.7	JANVIER Lab in France	9 weeks	single read	100	23693839	96.26	37.12	CD-1 (RjOrl:SWISS)
17	RNA	Ovary	Female2	Adult	1963sTS		8.5	JANVIER Lab in France	9 weeks	single read	100	21124146	96.26	37.13	CD-1 (RjOrl:SWISS)
18	RNA	Testis	Male1	Adult	1947sTS		8.4	JANVIER Lab in France	9 weeks	single read	100	20426331	96.42	37.13	CD-1 (RjOrl:SWISS)
19	RNA	Testis	Male2	Adult	1959sTS		8.2	JANVIER Lab in France	9 weeks	single read	100	35370086	95.69	36.98	CD-1 (RjOrl:SWISS)
Opossum
1	RNA	Brain	Female1	Adult	3957sTS		3.6	TX Biomedical Research Institute	180-day	single read	100	39662111	92.75	35.19
2	RNA	Brain	Male1	Adult	3951sTS		6.8	TX Biomedical Research Institute	180-day	single read	100	42914930	92.67	36.16
3	RNA	Heart	Female1	Adult	3959sTS		7.6	TX Biomedical Research Institute	180-day	single read	100	42960557	93.83	36.58
4	RNA	Heart	Female2	Adult	3996sTS		7.5	TX Biomedical Research Institute	180-day	single read	100	44097823	95.9	35.93
5	RNA	Heart	Male1	Adult	3953sTS		7.5	TX Biomedical Research Institute	180-day	single read	100	37735889	93.59	36.5
6	RNA	Heart	Male2	Adult	3990sTS		7	TX Biomedical Research Institute	180-day	single read	100	57243598	95.77	35.9
7	RNA	Kidney	Female1	Adult	3960sTS		6.2	TX Biomedical Research Institute	180-day	single read	100	38256321	93.45	36.43
8	RNA	Kidney	Female2	Adult	3998sTS		7.3	TX Biomedical Research Institute	180-day	single read	100	24532152	96.47	36.04
9	RNA	Kidney	Male1	Adult	3954sTS		7.4	TX Biomedical Research Institute	180-day	single read	100	39560714	93.29	36.37
10	RNA	Kidney	Male2	Adult	3992sTS		7.1	TX Biomedical Research Institute	180-day	single read	100	31958050	95.71	35.83
11	RNA	Liver	Female1	Adult	3961sTS		8.1	TX Biomedical Research Institute	180-day	single read	100	18942219	93.84	36.58
12	RNA	Liver	Female2	Adult	3997sTS		8.1	TX Biomedical Research Institute	180-day	single read	100	41860947	96.36	36.02
13	RNA	Liver	Male1	Adult	3955sTS		8.3	TX Biomedical Research Institute	180-day	single read	100	31727886	93.77	36.55
14	RNA	Liver	Male2	Adult	3991sTS		8.1	TX Biomedical Research Institute	180-day	single read	100	41910972	97.33	36.2
15	RNA	Ovary	Female2	Adult	3999sTS		8.5	TX Biomedical Research Institute	180-day	single read	100	19155663	95.97	35.91
16	RNA	Testis	Male1	Adult	3956sTS		8.5	TX Biomedical Research Institute	180-day	single read	100	52103410	93.29	36.39
17	RNA	Testis	Male2	Adult	3993sTS		8.4	TX Biomedical Research Institute	180-day	single read	100	33718138	95.78	35.9
Platypus
1	RNA	Brain	Female1	Adult	487sTS	6.9		Australia (Franck Grützner)	unknown	single read	100	33586391	96.31	36
2	RNA	Brain	Female2	Adult	655sTS	8.2		Australia (Franck Grützner)	unknown	single read	100	61145893	94.63	35.67
3	RNA	Brain	Male1	Adult	739sTS	8.7		Australia (Franck Grützner)	unknown	single read	100	42573904	91.91	35.79
4	RNA	Brain	Male2	Adult	1404sTS		7.8	Australia (Franck Grützner)	unknown	single read	100	39244392	87.86	34.63
5	RNA	Heart	Female1	Adult	501sTS	7.8		Australia (Franck Grützner)	unknown	single read	100	61389676	94.67	35.65
6	RNA	Heart	Female2	Adult	657sTS	8.3		Australia (Franck Grützner)	unknown	single read	100	39757003	93.24	35.4
7	RNA	Heart	Male1	Adult	1400sTS		8.6	Australia (Franck Grützner)	unknown	single read	100	55287820	87.13	34.38
8	RNA	Heart	Male2	Adult	1406sTS		7.9	Australia (Franck Grützner)	unknown	single read	100	51234843	88.24	34.79
9	RNA	Kidney	Female1	Adult	482sTS	7.9		Australia (Franck Grützner)	unknown	single read	100	53428414	94.43	35.62
10	RNA	Kidney	Female2	Adult	658sTS	8.9		Australia (Franck Grützner)	unknown	single read	100	79213734	93.01	35.34
11	RNA	Kidney	Male1	Adult	1402sTS		8.3	Australia (Franck Grützner)	unknown	single read	100	35584387	87.43	34.49
12	RNA	Kidney	Male2	Adult	1408sTS		5.9	Australia (Franck Grützner)	unknown	single read	100	30164329	87.09	34.4
13	RNA	Liver	Female1	Adult	486sTS	7.6		Australia (Franck Grützner)	unknown	single read	100	31815301	94.58	35.65
14	RNA	Liver	Female2	Adult	659sTS	9		Australia (Franck Grützner)	unknown	single read	100	57726918	93.13	35.38
15	RNA	Liver	Male1	Adult	1401sTS		7.6	Australia (Franck Grützner)	unknown	single read	100	25244792	87.25	34.41
16	RNA	Liver	Male2	Adult	1407sTS		8.2	Australia (Franck Grützner)	unknown	single read	100	58323344	87.18	34.41
17	RNA	Ovary	Female1	Adult	746sTS	9.3		Australia (Franck Grützner)	unknown	single read	100	41540320	91.5	35.63
18	RNA	Ovary	Female2	Adult	748sTS	6.4		Australia (Franck Grützner)	unknown	single read	100	35757932	92.79	35.29
19	RNA	Testis	Male1	Adult	1403sTS		7.9	Australia (Franck Grützner)	unknown	single read	100	34820608	91.01	35.53
20	RNA	Testis	Male2	Adult	1409sTS		7.7	Australia (Franck Grützner)	unknown	single read	100	57864252	86.6	34.24
Chicken
1	RNA	Brain	Female1	Adult	577sTS	9.4		Linkoping University (Isa Lindgren)	adult	single read	100	34366773	93.23	36.34
2	RNA	Brain	Female2	Adult	783sTS	8.9		Linkoping University (Isa Lindgren)	adult	single read	100	34736782	92.07	35.97
3	RNA	Brain	Male1	Adult	653sTS		7.6	Linkoping University (Isa Lindgren)	adult	single read	100	27722485	93.18	36.33
4	RNA	Brain	Male2	Adult	922sTS	8.4		Linkoping University (Isa Lindgren)	adult	single read	100	29822429	91.7	35.84
5	RNA	Heart	Female1	Adult	560sTS	9		Linkoping University (Isa Lindgren)	adult	single read	100	38640619	87.45	34.62
6	RNA	Heart	Female2	Adult	785sTS	8.7		Linkoping University (Isa Lindgren)	adult	single read	100	55100325	92.12	35.94
7	RNA	Heart	Male1	Adult	650sTS	8.2		Linkoping University (Isa Lindgren)	adult	single read	100	36099990	96.03	35.94
8	RNA	Heart	Male2	Adult	919sTS	7.6		Linkoping University (Isa Lindgren)	adult	single read	100	44584186	91.39	35.7
9	RNA	Kidney	Female1	Adult	559sTS	9.3		Linkoping University (Isa Lindgren)	adult	single read	100	47497964	87.77	34.71
10	RNA	Kidney	Female2	Adult	784sTS	9		Linkoping University (Isa Lindgren)	adult	single read	100	41810446	95.91	35.91
11	RNA	Kidney	Male1	Adult	555sTS	9.1		Linkoping University (Isa Lindgren)	adult	single read	100	35946791	87.64	34.67
12	RNA	Kidney	Male2	Adult	918sTS	8.3		Linkoping University (Isa Lindgren)	adult	single read	100	29271808	94.06	36.26
13	RNA	Liver	Female1	Adult	558sTS	8.9		Linkoping University (Isa Lindgren)	adult	single read	100	41014601	88.22	34.9
14	RNA	Liver	Female2	Adult	786sTS	9		Linkoping University (Isa Lindgren)	adult	single read	100	41534686	92.7	36.18
15	RNA	Liver	Male1	Adult	554sTS	9.2		Linkoping University (Isa Lindgren)	adult	single read	100	46648286	94.99	35.76
16	RNA	Liver	Male2	Adult	917sTS	8.8		Linkoping University (Isa Lindgren)	adult	single read	100	33502963	94.95	36.59
17	RNA	Ovary	Female1	Adult	561sTS	9.2		Linkoping University (Isa Lindgren)	adult	single read	100	38931935	88.21	34.88
18	RNA	Ovary	Female2	Adult	787sTSb	8.9		Linkoping University (Isa Lindgren)	adult	single read	100	21757252	92.44	36.1
19	RNA	Testis	Male1	Adult	642sTS	8.6		Linkoping University (Isa Lindgren)	adult	single read	100	44619248	93.61	36.5
20	RNA	Testis	Male2	Adult	920sTS	8.8		Linkoping University (Isa Lindgren)	adult	single read	100	52107421	92.51	36.1
Xenopus
1	RNA	Brain	Female1	Adult	956sTS	8.6		CRB Xénope - Université Rennes	adult 4-6 months	single read	100	26536706	95.77	37.09	Xenopus tropicalis, Tropical clawed frog
2	RNA	Brain	Female2	Adult	1046sTS	10		CRB Xénope - Université Rennes	adult 4-6 months	single read	100	44044752	92.77	36.17	Xenopus tropicalis, Tropical clawed frog
3	RNA	Brain	Male1	Adult	951sTS	9.3		CRB Xénope - Université Rennes	adult 4-6 months	single read	100	61973716	93.04	35.31	Xenopus tropicalis, Tropical clawed frog
4	RNA	Brain	Male2	Adult	1051sTS	8.5		CRB Xénope - Université Rennes	adult 4-6 months	single read	100	35215903	89.91	35.36	Xenopus tropicalis, Tropical clawed frog
5	RNA	Heart	Female1	Adult	957sTS	8.9		CRB Xénope - Université Rennes	adult 4-6 months	single read	100	39044082	95.87	37.1	Xenopus tropicalis, Tropical clawed frog
6	RNA	Heart	Female2	Adult	1047sTS	10		CRB Xénope - Université Rennes	adult 4-6 months	single read	100	49253357	92.83	36.18	Xenopus tropicalis, Tropical clawed frog
7	RNA	Heart	Male1	Adult	952sTS	9.3		CRB Xénope - Université Rennes	adult 4-6 months	single read	100	43315062	93.2	35.37	Xenopus tropicalis, Tropical clawed frog
8	RNA	Heart	Male2	Adult	1052sTS	8.9		CRB Xénope - Université Rennes	adult 4-6 months	single read	100	39911530	89.99	89.99	Xenopus tropicalis, Tropical clawed frog
9	RNA	Kidney	Female1	Adult	959sTS	8.9		CRB Xénope - Université Rennes	adult 4-6 months	single read	100	35284049	95.72	37.05	Xenopus tropicalis, Tropical clawed frog
10	RNA	Kidney	Female2	Adult	1049sTS	8.6		CRB Xénope - Université Rennes	adult 4-6 months	single read	100	73277942	90.03	35.38	Xenopus tropicalis, Tropical clawed frog
11	RNA	Kidney	Male1	Adult	954sTS	9		CRB Xénope - Université Rennes	adult 4-6 months	single read	100	73895435	94.6	35.65	Xenopus tropicalis, Tropical clawed frog
12	RNA	Kidney	Male2	Adult	1054sTS	9.1		CRB Xénope - Université Rennes	adult 4-6 months	single read	100	37918273	90.07	35.38	Xenopus tropicalis, Tropical clawed frog
13	RNA	Liver	Female1	Adult	958sTS	9		CRB Xénope - Université Rennes	adult 4-6 months	single read	100	34585437	95.97	37.21	Xenopus tropicalis, Tropical clawed frog
14	RNA	Liver	Female2	Adult	1048sTS	8.8		CRB Xénope - Université Rennes	adult 4-6 months	single read	100	46860398	91.3	35.85	Xenopus tropicalis, Tropical clawed frog
15	RNA	Liver	Male1	Adult	953sTS	9.2		CRB Xénope - Université Rennes	adult 4-6 months	single read	100	57981345	94.78	35.7	Xenopus tropicalis, Tropical clawed frog
16	RNA	Liver	Male2	Adult	1053sTS	9.1		CRB Xénope - Université Rennes	adult 4-6 months	single read	100	43814275	90.73	35.62	Xenopus tropicalis, Tropical clawed frog
17	RNA	Ovary	Female1	Adult	960sTS	8.6		CRB Xénope - Université Rennes	adult 4-6 months	single read	100	37281699	95.53	37.02	Xenopus tropicalis, Tropical clawed frog
18	RNA	Ovary	Female2	Adult	1090sTSb	8.6		CRB Xénope - Université Rennes	adult 4-6 months	single read	100	39902382	90.2	35.44	Xenopus tropicalis, Tropical clawed frog
19	RNA	Testis	Male1	Adult	955sTS	9		CRB Xénope - Université Rennes	adult 4-6 months	single read	100	47841015	94.57	35.65	Xenopus tropicalis, Tropical clawed frog
20	RNA	Testis	Male2	Adult	1056sTSb	8.9		CRB Xénope - Université Rennes	adult 4-6 months	single read	100	57474523	90.3	35.45	Xenopus tropicalis, Tropical clawed frog
Anolis
	DNA	Kidney	Female1	Adult	2376g			Michigan State University (Prof. Juli Wade)	adult, breeding season	paired-end reads	100	307611832	94.95	37.03
	DNA	Liver	Female5	Adult	1164g			Michigan State University (Prof. Juli Wade)	adult, breeding season	paired-end reads	100	350582638	88.85	35.21
	DNA	fat body	Male5	Adult	1163g			Michigan State University (Prof. Juli Wade)	adult, breeding season	paired-end reads	100	286898762	89.63	35.46
	DNA	Liver	Female2	Adult	6280g (ANOF2060716)			Aquaterra Shop (Germany)	adult, breeding season	paired-end reads	100	310330762	92.32	36.16
Brachylophus fasciatus (Fiji banded iguana)
	DNA	Liver	Male1	Adult	2675g			Zurich Zoo		paired-end reads	100	309483812	94.24	36.8
												16749158
												79213734
												3.40581e+07

## Sheet: Supp Table 3
Supplementary Table 3. Detailed information about Y genes in Anolis.
Species	Gene number	protein-coding	mRNA length (nt)	CDS length (nt)	Completeness	Source of sequence	X gametolog	X gametolog contig	dS	Strata	Orthologs in chicken	Present on the Y chr. of the the Fiji banded iguana	% of Y sequence covered with male genomic reads (100% id)	Median Coverage	% of Y sequence covered with female genomic reads (100% id)	Median Coverage	Number of predicted copies for Y sequences		Gene Name	Gene Fonction (from GeneCards)
																	at 100% identity	at 98% identity
Anolis	1	RPL6Y	2576	774	1	Rna_seq	ENSACAG00000003060	Scaffold GL343282.1: 302,046-313,144	1.7397	S1	Chr. 15	Yes	98.8742	10	0	0	1	1	Ribosomal protein L6	The protein belongs to the L6E family of ribosomal proteins. It is located in the cytoplasm. The protein can bind specifically to domain C of the tax-responsive enhancer element of human T-cell leukemia virus type 1, and it has been suggested that the protein may participate in tax-mediated transactivation of transcription.
Anolis	2	UBE2L3Y	2759	462	1	Rna_seq	ENSACAG00000001743	Scaffold GL343282.1: 1,138,838-1,145,337	0.6949	S1	Chr. 15	Yes	99.5651	10	0	0	1	1	Ubiquitin-conjugating enzyme E2L 3	Ubiquitin-conjugating enzyme E2 that specifically acts with HECT-type and RBR family E3 ubiquitin-protein ligases.
Anolis	3	RTDR1Y	541	469	>90%	Rna_seq	ENSACAG00000002259	Contig AAWZ02037698: 672-8,224	0.6286	S1	Chr. 15	No; But tree shows it belongs to S1	89.2791	3	0	0	1	1	Rhabdoid tumor deletion region gene 1	This gene encodes a protein with no known function but with slight similarity to a yeast vacuolar protein.
Anolis	4	PPP1CCY	2253	954	1	Rna_seq	ENSACAG00000002065	Scaffold GL343423.1: 393,055-421,796	0.5811	S1	Chr. 15	Yes	99.9556	9	10.253	0	1	1	Protein phosphatase 1, catalytic subunit, gamma isozyme	The protein encoded by this gene belongs to the protein phosphatase family, PP1 subfamily. PP1 is an ubiquitous serine/threonine phosphatase that regulates many cellular processes, including cell division.
Anolis	5	DENRY	1375	588	1	Rna_seq	ENSACAG00000016012	Chromosome LGb: 2,136,997-2,142,606	0.3473	S2	Chr. 15	No	98.6182	13	0	0	1	1	Density-regulated protein	This gene encodes a protein whose expression was found to increase in cultured cells at high density but not during growth arrest. May be involved in the translation of target mRNAs by scanning and recognition of the initiation codon.
Anolis	6	EWSR1Y	1643	966	1	Rna_seq	ENSACAG00000009298	Scaffold GL343417.1: 98,659-110,655	0.149	S2	Chr. 15	No	92.4528	4	19.5374	0	1	1	Ewing sarcoma breakpoint region 1	This gene encodes a multifunctional protein that is involved in various cellular processes, including gene expression, cell signaling, and RNA processing and transport. Might normally function as a transcriptionnal repressor.
Anolis	7	SLC5A1Y	910	171	<90%	Rna_seq	ENSACAG00000002264	Contig AAWZ02037698: 8,856-14,937	0.0781	S3	Chr. 15	No	96.3736	5	23.7363	0	1	1	Solute carrier family 5 (sodium/glucose cotransporter), member 1	Actively transports glucose into cells by Na(+) cotransport with a Na(+) to glucose coupling ratio of 2:1. The encoded integral membrane protein is the primary mediator of dietary glucose and galactose uptake from the intestinal lumen.
		Pseudogenes
Anolis	1	CCDC74BY		1386	<90%	Rna_seq	Absent		NA		Unknown	No	95.0938	4	0	0	1	1	Coiled-coil domain containing 74B	CCDC74B (coiled-coil domain containing 74B) is a protein-coding gene.
Anolis	2	UncharacterizedY		612	<90%	Rna_seq	Absent		NA		Unknown	No	92.3203	4	0	0	1	1
Anolis	3	SETD2Y		606	<90%	Rna_seq	ENSACAG00000002296	Scaffold GL343918.1: 47,324-113,132	0.0828		Chr. 2	No	92.5743	4	29.0429	0	1	1	SET domain containing 2	Histone methyltransferase that methylates 'Lys-36' of histone H3. H3 'Lys-36' methylation represents a specific tag for epigenetic transcriptional activation. Probably plays a role in chromatin structure modulation during elongation via its interaction with hyperphosphorylated POLR2A. Binds DNA at promoters. May also act as a transcription activator that binds to promoters.
Anolis	4	PMYL-like		619	<90%	Rna_seq	Absent		NA		Unknown	No	94.8304	10	0	0	1	1
Anolis	5	UNGY		662	<90%	Rna_seq	Absent		NA		Chr. 15	No	97.281	5	32.0242	0	1	1	Uracil-DNA glycosylase	Excises uracil residues from the DNA which can arise as a result of misincorporation of dUMP residues by DNA polymerase or due to deamination of cytosine
Anolis	6	PMLY		2139	1	Rna_seq	Absent		NA		Chr. 10	No	95.6989	12	16.7368	0	1	1	Promyelocytic leukemia	The protein encoded by this gene is a member of the tripartite motif (TRIM) family. The TRIM motif includes three zinc-binding domains, a RING, a B-box type 1 and a B-box type 2, and a coiled-coil region. This phosphoprotein localizes to nuclear bodies where it functions as a transcription factor and tumor suppressor. Its expression is cell-cycle related and it regulates the p53 response to oncog…
Anolis	7	FHOD1Y-like		1234	<90%	Rna_seq	Absent		NA		Unknown	No	94.0843	6	16.1264	0	1	1
		Noncoding RNAs															1	1
Anolis	1	lizard_Y_noncoding_all_Male_Embryo_contig40397	1154		(exclusive of embryonic samples)	Rna_seq						No	99.9133	8	0	0	1	1
Anolis	2	lizard_Y_noncoding_all_Male_Embryo_contig6018	1208		(exclusive of embryonic samples)	Rna_seq						No	99.9172	6	0	0	1	1
Anolis	3	lizard_Y_noncoding_all_Male_Embryo_contig31107	1218		(exclusive of embryonic samples)	Rna_seq						No	98.4401	8	0	0	1	1
Anolis	4	lizard_Y_noncoding_all_Male_Embryo_contig33454	1322		(exclusive of embryonic samples)	Rna_seq						No	99.6218	4	0	0	1	1
Anolis	5	lizard_Y_noncoding_all_Male_Embryo_contig22080	576		(exclusive of embryonic samples)	Rna_seq						No	96.5278	6	0	0	1	1
Anolis	6	lizard_Y_noncoding_all_Male_Embryo_contig31655	722		(exclusive of embryonic samples)	Rna_seq						No	99.169	4	0	0	1	1
Anolis	7	lizard_Y_noncoding_all_Male_Embryo_contig22818	898		(exclusive of embryonic samples)	Rna_seq						No	96.6592	9	0	0	1	1
Anolis	8	lizard_Y_noncoding_all_Male_Embryo_contig34147	923		(exclusive of embryonic samples)	Rna_seq						No	98.0498	9	0	0	1	1
Anolis	9	lizard_Y_noncoding_Male14dEmbryo_2764sTS_len_665	665		(exclusive of embryonic samples)	Rna_seq						No	99.8496	5	0	0	1	1
Anolis	10	lizard_Y_noncoding_allMaleEmbryo_contig979_len_849	849		(exclusive of embryonic samples)	Rna_seq						No	99.8822	5	0	0	1	1
Anolis	11	lizard_Y_noncoding_allMaleEmbryo_contig9559_len_562	562		(exclusive of embryonic samples)	Rna_seq						No	89.8577	7	0	0	1	1
Anolis	12	lizard_Y_noncoding_allMaleEmbryo_contig6379_len_1008	1008		(exclusive of embryonic samples)	Rna_seq						No	95.6349	5	4.86111	0	1	1
Anolis	13	lizard_Y_noncoding_allMaleEmbryo_contig5521_len_512	512		(exclusive of embryonic samples)	Rna_seq						No	99.8047	7	0	0	1	1
Anolis	14	lizard_Y_noncoding_allMaleEmbryo_contig4598_len_546	546		(exclusive of embryonic samples)	Rna_seq						No	99.8168	6	0	0	1	1
Anolis	15	lizard_Y_noncoding_allMaleEmbryo_contig43875_len_559	559		(exclusive of embryonic samples)	Rna_seq						No	99.8211	8	0	0	1	1
Anolis	16	lizard_Y_noncoding_allMaleEmbryo_contig43596_len_861	861		(exclusive of embryonic samples)	Rna_seq						No	97.9094	8	0	0	1	1
Anolis	17	lizard_Y_noncoding_allMaleEmbryo_contig41349_len_515	515		(exclusive of embryonic samples)	Rna_seq						No	91.4563	3	0	0	1	1
Anolis	18	lizard_Y_noncoding_allMaleEmbryo_contig39946_len_532	532		(exclusive of embryonic samples)	Rna_seq						No	99.812	7	0	0	1	1
Anolis	19	lizard_Y_noncoding_allMaleEmbryo_contig39760_len_656	656		(exclusive of embryonic samples)	Rna_seq						No	99.8476	7	0	0	1	1
Anolis	20	lizard_Y_noncoding_allMaleEmbryo_contig39159_len_562	562		(exclusive of embryonic samples)	Rna_seq						No	96.9751	8	0	0	1	1
Anolis	21	lizard_Y_noncoding_allMaleEmbryo_contig38262_len_995	995		(exclusive of embryonic samples)	Rna_seq						No	90.0503	7	0	0	1	1
Anolis	22	lizard_Y_noncoding_allMaleEmbryo_contig37351_len_581	581		(exclusive of embryonic samples)	Rna_seq						No	99.8279	4	0	0	1	1
Anolis	23	lizard_Y_noncoding_allMaleEmbryo_contig36250_len_1405	1405		(exclusive of embryonic samples)	Rna_seq						No	99.9288	7	0	0	1	1
Anolis	24	lizard_Y_noncoding_allMaleEmbryo_contig35839_len_691	691		(exclusive of embryonic samples)	Rna_seq						No	99.8553	9	0	0	1	1
Anolis	25	lizard_Y_noncoding_allMaleEmbryo_contig35728_len_622	622		(exclusive of embryonic samples)	Rna_seq						No	99.8392	8	0	0	1	1
Anolis	26	lizard_Y_noncoding_allMaleEmbryo_contig35168_len_538	538		(exclusive of embryonic samples)	Rna_seq						No	99.8141	9	0	0	1	1
Anolis	27	lizard_Y_noncoding_allMaleEmbryo_contig35097_len_801	801		(exclusive of embryonic samples)	Rna_seq						No	97.7528	14	0	0	[2-10]	[2-10]
Anolis	28	lizard_Y_noncoding_allMaleEmbryo_contig34100_len_604	604		(exclusive of embryonic samples)	Rna_seq						No	93.2119	5	0	0	1	1
Anolis	29	lizard_Y_noncoding_allMaleEmbryo_contig33745_len_594	594		(exclusive of embryonic samples)	Rna_seq						No	83.3333	6	0	0	1	1
Anolis	30	lizard_Y_noncoding_allMaleEmbryo_contig33569_len_513	513		(exclusive of embryonic samples)	Rna_seq						No	99.8051	11	0	0	1	1
Anolis	31	lizard_Y_noncoding_allMaleEmbryo_contig3354_len_589	589		(exclusive of embryonic samples)	Rna_seq						No	97.7929	10.5	0	0	1	1
Anolis	32	lizard_Y_noncoding_allMaleEmbryo_contig28991_len_1148	1148		(exclusive of embryonic samples)	Rna_seq						No	95.5575	7	8.27526	0	1	1
Anolis	33	lizard_Y_noncoding_allMaleEmbryo_contig25972_len_806	806		(exclusive of embryonic samples)	Rna_seq						No	99.8759	10	0	0	1	1
Anolis	34	lizard_Y_noncoding_allMaleEmbryo_contig25840_len_1696	1696		(exclusive of embryonic samples)	Rna_seq						No	99.941	8	0	0	1	1
Anolis	35	lizard_Y_noncoding_allMaleEmbryo_contig24486_len_583	583		(exclusive of embryonic samples)	Rna_seq						No	99.8285	5.5	0	0	1	1
Anolis	36	lizard_Y_noncoding_allMaleEmbryo_contig24276_len_762	762		(exclusive of embryonic samples)	Rna_seq						No	99.8688	7	0	0	1	1
Anolis	37	lizard_Y_noncoding_allMaleEmbryo_contig23339_len_578	578		(exclusive of embryonic samples)	Rna_seq						No	99.827	5	0	0	1	1
Anolis	38	lizard_Y_noncoding_allMaleEmbryo_contig21821_len_538	538		(exclusive of embryonic samples)	Rna_seq						No	99.8141	9	0	0	1	1
Anolis	39	lizard_Y_noncoding_allMaleEmbryo_contig21382_len_927	927		(exclusive of embryonic samples)	Rna_seq						No	97.1953	8	0	0	1	1
Anolis	40	lizard_Y_noncoding_allMaleEmbryo_contig21303_len_523	523		(exclusive of embryonic samples)	Rna_seq						No	94.4551	6	0	0	1	1
Anolis	41	lizard_Y_noncoding_allMaleEmbryo_contig19717_len_819	819		(exclusive of embryonic samples)	Rna_seq						No	97.558	15	0	0	[2-10]	[2-10]
Anolis	42	lizard_Y_noncoding_allMaleEmbryo_contig18881_len_1130	1130		(exclusive of embryonic samples)	Rna_seq						No	99.9115	7	0	0	1	1
Anolis	43	lizard_Y_noncoding_allMaleEmbryo_contig11442_len_558	558		(exclusive of embryonic samples)	Rna_seq						No	99.8208	7	0	0	1	1
Anolis	44	lizard_Y_noncoding_allMaleEmbryo_contig10873_len_528	528		(exclusive of embryonic samples)	Rna_seq						No	97.7273	11	0	0	1	1
Anolis	45	lizard_Y_noncoding_Sequence_1	1102		(exclusive of adult samples)	Rna_seq						No	98.2759	9	22.2323	0	1	1
Anolis	46	lizard_Y_noncoding_Sequence_2	1148		(exclusive of adult samples)	Rna_seq						No	97.561	7	0	0	1	1
Anolis	47	lizard_Y_noncoding_Sequence_3	1181		(exclusive of adult samples)	Rna_seq						No	98.1372	5	5.58848	0	1	1
Anolis	48	lizard_Y_noncoding_Sequence_4	1488		(exclusive of adult samples)	Rna_seq						No	93.078	4	0	0	1	1
Anolis	49	lizard_Y_noncoding_Sequence_5	2623		(exclusive of adult samples)	Rna_seq						No	95.6538	8	25.7339	0	1	1
Anolis	50	lizard_Y_noncoding_Sequence_6	567		(exclusive of adult samples)	Rna_seq						No	99.8236	5			1	1
Anolis	51	lizard_Y_noncoding_9_ACE_CONTIG_26231_len_273	273		(exclusive of adult samples)	Rna_seq						No	81.3187	8	0	0	1	1
Anolis	52	lizard_Y_noncoding_9_ACE_CONTIG_14723_len_778	778		(exclusive of adult samples)	Rna_seq						No	99.8715	17	25.7069	0	[2-10]	[2-10]
Anolis	53	lizard_Y_noncoding_8_ACE_CONTIG_25281_len_466	466		(exclusive of adult samples)	Rna_seq						No	60.3004	6	0	0	1	1
Anolis	54	lizard_Y_noncoding_8_ACE_CONTIG_2105_len_777	777		(exclusive of adult samples)	Rna_seq						No	99.8713	10	0	0	1	1
Anolis	55	lizard_Y_noncoding_7_ACE_CONTIG_25807_len_298	298		(exclusive of adult samples)	Rna_seq						No	99.6644	6	19.7987	0	1	1
Anolis	56	lizard_Y_noncoding_7_ACE_CONTIG_15082_len_735	735		(exclusive of adult samples)	Rna_seq						No	99.8639	9	0	0	1	1
Anolis	57	lizard_Y_noncoding_62_ACE_CONTIG_16721_len_673	673		(exclusive of adult samples)	Rna_seq						No	98.8113	5	0	0	1	1
Anolis	58	lizard_Y_noncoding_6_ACE_CONTIG_2689_len_316	316		(exclusive of adult samples)	Rna_seq						No	99.3671	6	22.4684	0	1	1
Anolis	59	lizard_Y_noncoding_58_ACE_CONTIG_17078_len_396	396		(exclusive of adult samples)	Rna_seq						No	99.7475	6	0	0	1	1
Anolis	60	lizard_Y_noncoding_57_ACE_CONTIG_4023_len_465	465		(exclusive of adult samples)	Rna_seq						No	99.7849	17	16.9892	0	1	[2-10]
Anolis	61	lizard_Y_noncoding_56_ACE_CONTIG_19683_len_266	266		(exclusive of adult samples)	Rna_seq						No	99.6241	16	0	0	1	[2-10]
Anolis	62	lizard_Y_noncoding_55_ACE_CONTIG_7949_len_296	296		(exclusive of adult samples)	Rna_seq						No	99.6622	4	25	0	1	1
Anolis	63	lizard_Y_noncoding_54_ACE_CONTIG_2459_len_306	306		(exclusive of adult samples)	Rna_seq						No	99.6732	14	0	0	1	1
Anolis	64	lizard_Y_noncoding_53_ACE_CONTIG_20481_len_475	475		(exclusive of adult samples)	Rna_seq						No	97.4737	10	0	0	1	1
Anolis	65	lizard_Y_noncoding_52_ACE_CONTIG_17293_len_424	424		(exclusive of adult samples)	Rna_seq						No	99.7642	10	24.7642	0	1	1
Anolis	66	lizard_Y_noncoding_51_ACE_CONTIG_23849_len_484	484		(exclusive of adult samples)	Rna_seq						No	96.4876	47	12.6033	0	[2-10]	[2-10]
Anolis	67	lizard_Y_noncoding_50_ACE_CONTIG_27088_len_218	218		(exclusive of adult samples)	Rna_seq						No	99.5413	3	0	0	1	1
Anolis	68	lizard_Y_noncoding_5_ACE_CONTIG_20424_len_537	537		(exclusive of adult samples)	Rna_seq						No	99.8138	5	0	0	1	1
Anolis	69	lizard_Y_noncoding_5_ACE_CONTIG_16341_len_354	354		(exclusive of adult samples)	Rna_seq						No	99.7175	20	0	0	[2-10]	[2-10]
Anolis	70	lizard_Y_noncoding_49_ACE_CONTIG_23134_len_327	327		(exclusive of adult samples)	Rna_seq						No	99.3884	7	29.052	0	1	1
Anolis	71	lizard_Y_noncoding_48_ACE_CONTIG_25220_len_362	362		(exclusive of adult samples)	Rna_seq						No	99.7238	12	0	0	1	1
Anolis	72	lizard_Y_noncoding_47_ACE_CONTIG_3499_len_373	373		(exclusive of adult samples)	Rna_seq						No	91.9571	7	19.571	0	1	1
Anolis	73	lizard_Y_noncoding_47_ACE_CONTIG_12946_len_727	727		(exclusive of adult samples)	Rna_seq						No	97.1114	11	26.9601	0	1	1
Anolis	74	lizard_Y_noncoding_46_ACE_CONTIG_17244_len_520	520		(exclusive of adult samples)	Rna_seq						No	98.6538	10	11.1538	0	1	1
Anolis	75	lizard_Y_noncoding_46_ACE_CONTIG_14429_len_427	427		(exclusive of adult samples)	Rna_seq						No	99.0632	11	33.7237	0	1	1
Anolis	76	lizard_Y_noncoding_45_ACE_CONTIG_24530_len_377	377		(exclusive of adult samples)	Rna_seq						No	90.1857	6	18.3024	0	1	1
Anolis	77	lizard_Y_noncoding_44_ACE_CONTIG_228_len_324	324		(exclusive of adult samples)	Rna_seq						No	99.6914	5	23.4568	0	1	1
Anolis	78	lizard_Y_noncoding_43_ACE_CONTIG_25371_len_269	269		(exclusive of adult samples)	Rna_seq						No	99.6283	13	0	0	[2-10]	[2-10]
Anolis	79	lizard_Y_noncoding_42_ACE_CONTIG_20482_len_379	379		(exclusive of adult samples)	Rna_seq						No	99.7361	8	31.3984	0	1	1
Anolis	80	lizard_Y_noncoding_42_ACE_CONTIG_12998_len_733	733		(exclusive of adult samples)	Rna_seq						No	99.8636	13	0	0	1	1
Anolis	81	lizard_Y_noncoding_40_ACE_CONTIG_3935_len_418	418		(exclusive of adult samples)	Rna_seq						No	99.7608	10	0	0	1	1
Anolis	82	lizard_Y_noncoding_40_ACE_CONTIG_14518_len_811	811		(exclusive of adult samples)	Rna_seq						No	90.1356	6	0	0	1	1
Anolis	83	lizard_Y_noncoding_4_ACE_CONTIG_23951_len_260	260		(exclusive of adult samples)	Rna_seq						No	99.6154	11	0	0	1	1
Anolis	84	lizard_Y_noncoding_39_ACE_CONTIG_4723_len_304	304		(exclusive of adult samples)	Rna_seq						No	85.8553	15	0	0	1	1
Anolis	85	lizard_Y_noncoding_39_ACE_CONTIG_21233_len_940	940		(exclusive of adult samples)	Rna_seq						No	99.8936	18	0	0	[2-10]	[2-10]
Anolis	86	lizard_Y_noncoding_37_ACE_CONTIG_25801_len_208	208		(exclusive of adult samples)	Rna_seq						No	64.4231	3	0	0	1	1
Anolis	87	lizard_Y_noncoding_36_ACE_CONTIG_12597_len_282	282		(exclusive of adult samples)	Rna_seq						No	66.3121	3	0	0	1	1
Anolis	88	lizard_Y_noncoding_34_ACE_CONTIG_16889_len_492	492		(exclusive of adult samples)	Rna_seq						No	96.748	8	0	0	1	1
Anolis	89	lizard_Y_noncoding_33_ACE_CONTIG_7628_len_358	358		(exclusive of adult samples)	Rna_seq						No	80.4469	7	0	0	1	1
Anolis	90	lizard_Y_noncoding_33_ACE_CONTIG_14470_len_612	612		(exclusive of adult samples)	Rna_seq						No	89.0523	5	0	0	1	1
Anolis	91	lizard_Y_noncoding_32_CL11794Contig1_12365%_len_534	534		(exclusive of adult samples)	Rna_seq						No	99.8127	18	0	0	[2-10]	[2-10]
Anolis	92	lizard_Y_noncoding_32_ACE_CONTIG_6040_len_302	302		(exclusive of adult samples)	Rna_seq						No	99.3377	7	0	0	1	1
Anolis	93	lizard_Y_noncoding_31_ACE_CONTIG_7405_len_361	361		(exclusive of adult samples)	Rna_seq						No	76.4543	2	0	0	1	1
Anolis	94	lizard_Y_noncoding_30_ACE_CONTIG_8427_len_317	317		(exclusive of adult samples)	Rna_seq						No	99.6845	42	0	0	[2-10]	[2-10]
Anolis	95	lizard_Y_noncoding_30_ACE_CONTIG_560_len_1621	1621		(exclusive of adult samples)	Rna_seq						No	90.3146	6	3.26959	0	1	1
Anolis	96	lizard_Y_noncoding_3_ACE_CONTIG_20044_len_333	333		(exclusive of adult samples)	Rna_seq						No	76.5766	6	0	0	1	1
Anolis	97	lizard_Y_noncoding_29_ACE_CONTIG_3387_len_304	304		(exclusive of adult samples)	Rna_seq						No	99.6711	11	25.6579	0	1	1
Anolis	98	lizard_Y_noncoding_28_ACE_CONTIG_25788_len_281	281		(exclusive of adult samples)	Rna_seq						No	99.6441	24	0	0	[2-10]	[2-10]
Anolis	99	lizard_Y_noncoding_26_ACE_CONTIG_19800_len_478	478		(exclusive of adult samples)	Rna_seq						No	96.0251	11	0	0	1	1
Anolis	100	lizard_Y_noncoding_25_ACE_CONTIG_4242_len_940	940		(exclusive of adult samples)	Rna_seq						No	99.8936	8	0	0	1	1
Anolis	101	lizard_Y_noncoding_25_ACE_CONTIG_14760_len_260	260		(exclusive of adult samples)	Rna_seq						No	99.6154	4	0	0	1	1
Anolis	102	lizard_Y_noncoding_24_CL7269Contig1_7895%_len_630	630		(exclusive of adult samples)	Rna_seq						No	99.8413	6	0	0	1	1
Anolis	103	lizard_Y_noncoding_24_ACE_CONTIG_16637_len_806	806		(exclusive of adult samples)	Rna_seq						No	99.8759	8	0	0	1	1
Anolis	104	lizard_Y_noncoding_22_ACE_CONTIG_18973_len_407	407		(exclusive of adult samples)	Rna_seq						No	99.7543	40	0	0	[2-10]	[2-10]
Anolis	105	lizard_Y_noncoding_21_ACE_CONTIG_22319_len_980	980		(exclusive of adult samples)	Rna_seq						No	90.9184	3	0	0	1	1
Anolis	106	lizard_Y_noncoding_21_ACE_CONTIG_18971_len_465	465		(exclusive of adult samples)	Rna_seq						No	93.5484	8	12.043	0	1	1
Anolis	107	lizard_Y_noncoding_2_ACE_CONTIG_26036_len_211	211		(exclusive of adult samples)	Rna_seq						No	96.6825	5	33.1754	0	1	1
Anolis	108	lizard_Y_noncoding_2_ACE_CONTIG_20663_len_633	633		(exclusive of adult samples)	Rna_seq						No	92.2591	6	0	0	1	1
Anolis	109	lizard_Y_noncoding_18_CL677Contig1_1195%_len_776	776		(exclusive of adult samples)	Rna_seq						No	97.4227	9	10.3093	0	1	1
Anolis	110	lizard_Y_noncoding_18_ACE_CONTIG_3725_len_478	478		(exclusive of adult samples)	Rna_seq						No	99.7908	8	0	0	1	1
Anolis	111	lizard_Y_noncoding_17_ACE_CONTIG_14960_len_349	349		(exclusive of adult samples)	Rna_seq						No	99.7135	6	32.9513	0	1	1
Anolis	112	lizard_Y_noncoding_16_ACE_CONTIG_4403_len_250	250		(exclusive of adult samples)	Rna_seq						No	93.6	15	37.2	0	1	1
Anolis	113	lizard_Y_noncoding_15_ACE_CONTIG_25816_len_224	224		(exclusive of adult samples)	Rna_seq						No	99.5536	8	0	0	1	1
Anolis	114	lizard_Y_noncoding_14_ACE_CONTIG_22443_len_492	492		(exclusive of adult samples)	Rna_seq						No	99.7967	7	0	0	1	1
Anolis	115	lizard_Y_noncoding_13_ACE_CONTIG_23599_len_439	439		(exclusive of adult samples)	Rna_seq						No	94.0774	17	0	0	[2-10]	[2-10]
Anolis	116	lizard_Y_noncoding_12_ACE_CONTIG_11407_len_326	326		(exclusive of adult samples)	Rna_seq						No	99.6933	24	0	0	[2-10]	[2-10]
Anolis	117	lizard_Y_noncoding_11_ACE_CONTIG_4316_len_248	248		(exclusive of adult samples)	Rna_seq						No	99.5968	6	0	0	1	1
Anolis	118	lizard_Y_noncoding_10_ACE_CONTIG_25143_len_443	443		(exclusive of adult samples)	Rna_seq						No	99.7743	13	0	0	1	1
Anolis	119	lizard_Y_noncoding_10_ACE_CONTIG_24716_len_871	871		(exclusive of adult samples)	Rna_seq						No	99.8852	8	9.41447	0	1	1
Anolis	120	lizard_Y_noncoding_1_ACE_CONTIG_5665_len_2593	2593		(exclusive of adult samples)	Rna_seq						No	99.9614	9	0	0	1	1
Anolis	121	lizard_Y_noncoding_1_ACE_CONTIG_19292_len_445	445		(exclusive of adult samples)	Rna_seq						No	93.2584	16	13.0337	0	[2-10]	[2-10]
Anolis	122	lizard_Y_noncoding_68_ACE_CONTIG_11262_len_636	636		(exclusive of adult samples)	Rna_seq						No	99.8428	14	45.9119	0	1	1
Anolis	123	lizard_Y_noncoding_41_ACE_CONTIG_12750_len_292	292		(exclusive of adult samples)	Rna_seq						No	99.6575	12	43.8356	0	1	1
Anolis	124	lizard_Y_noncoding_38_ACE_CONTIG_2854_len_354	354		(exclusive of adult samples)	Rna_seq						No	99.435	7	38.9831	0	1	1
Anolis	125	lizard_Y_noncoding_35_ACE_CONTIG_12611_len_274	274		(exclusive of adult samples)	Rna_seq						No	92.3358	16	39.781	0	1	[2-10]
Anolis	126	lizard_Y_noncoding_26_ACE_CONTIG_316_len_1082	1082		(exclusive of adult samples)	Rna_seq						No	98.0591	8	49.353	0	1	1
Anolis	127	lizard_Y_noncoding_23_ACE_CONTIG_2660_len_225	225		(exclusive of adult samples)	Rna_seq						No	95.1111	3	48.8889	0	1	1
Anolis	128	lizard_Y_noncoding_20_ACE_CONTIG_3739_len_303	303		(exclusive of adult samples)	Rna_seq						No	95.3795	5	44.2244	0	1	1
		Viral / TE
Anolis	1	RT-like (exclusive of embryonic samples)	964			Rna_seq						No	99.8963	8	0	0	1	1
Anolis	2	Viral-related (exclusive of embryonic samples)	860			Rna_seq						No	87.2093	5	0	0	1	1
Anolis	3	LINE2 (exclusive of embryonic samples)	574			Rna_seq						No	99.8258	6	0	0	1	1
Anolis	4	Viral-related (exclusive of embryonic samples)	573			Rna_seq						No	74.3455	6	0	0	1	1
		UTRs
Anolis	1	UTR	807			Rna_seq						No	98.7608	9	29.9876	0	1	1
Anolis	2	DIAPH3-UTR	758			Rna_seq						No	92.876	12	31.0026	0	1	1
Anolis	3	SSH1-UTR	684			Rna_seq						No	99.8538	9	0	0	1	1
Anolis	4	UTR	693			Rna_seq						No	91.1977	7	0	0	1	1

## Sheet: Supp Table 4
Supplementary Table 4. Detailed information of the Top Five male-biased genes in Anolis (genes being at least 1.5 times more expressed in males than in females and with an expression in males equal or above 5 FPKM).
						Expression in somatic tissues (FPKM)
						MALE				FEMALE					Male/female ratios per tissue
Ranking	Anolis gene	Human gene	Gene name and links to http://www.genenames.org	ASU2.2.1 name	Description	brain	hear	kidney	liver	brain	hear	kidney	liver		brain ratio	heart ratio	liver ratio	kidney ratio		Index*
1	ENSACAG00000009112	ENSG00000022267	FHL1		This gene encodes a member of the four-and-a-half-LIM-only protein family. Family members contain two highly conserved, tandemly arranged, zinc finger domains with four highly conserved cysteines binding a zinc atom in each zinc finger. Expression of these family members occurs in a cell- and tissue-specific mode and these proteins are involved in many cellular processes. Mutations in this gene h…	13.0636	1443.49	135.637	134.768	8.62826	857.326	82.6545	87.0395		1.51405	1.68372	1.64101	1.54835		0.263611
2	ENSACAG00000012505	ENSG00000166313	APBB1		Transcription coregulator that can have both coactivator and corepressor functions. Adapter protein that forms a transcriptionally active complex with the gamma-secretase-derived amyloid precursor protein (APP) intracellular domain. Plays a central role in the response to DNA damage by translocating to the nucleus and inducing apoptosis. May act by specifically recognizing and binding histone H2A…	333.991	152.499	93.6113	95.8771	169.46	59.8329	38.3567	38.6609		1.97092	2.54875	2.44055	2.47995		0.26999
3	ENSACAG00000008969	ENSG00000164346	NSA2	ASU_Acar_G.2659	This gene encodes a nucleolar protein involved in cell cycle regulation and proliferation. This gene was identified based on sequence similarity to a highly conserved Saccharomyces cerevisiae gene encoding a pre-ribosomal protein, which is involved in large ribosomal subunit biogenesis. The encoded protein is found at elevated levels in diabetic nephropathy. Alternative splicing results in multip…	17.9633	135.676	149.407	158.209	8.07948	72.6384	71.8967	86.7986		2.22332	1.86782	2.07808	1.82271		0.278196
4	ENSACAG00000022881	ENSG00000066654	THUMPD1	ASU_Acar_G.11951	THUMPD1 (THUMP domain containing 1) is a protein-coding gene. GO annotations related to this gene include RNA binding.	12.13	11.5941	19.2869	15.6289	1.38944	1.35232	2.58487	2.39983		8.73016	8.5735	7.46144	6.51253		0.279118
5	ENSACAG00000007708	ENSG00000166848	TERF2IP		Acts both as a regulator of telomere function and as a transcription regulator. Involved in the regulation of telomere length and protection as a component of the shelterin complex (telosome). In contrast to other components of the shelterin complex, it is dispensible for telomere capping and does not participate in the protection of telomeres against non-homologous end-joining (NHEJ)-mediated re…	17.4044	16.7099	27.5215	25.0662	8.94863	10.1352	17.2928	14.8197		1.94493	1.64869	1.5915	1.69141		0.282835
					*Index = genes are ranked by balanced male/female ratios across somatic tissues. Given the expected nature of the mechanism acting on the X chromosome, similar effects on all tissues should be observed.

## Sheet: Supp Table 5
Supplementary Table 5. Detailed information of known and predicted X-linked contigs.
Contig/Scaffold	length	ave_cum_dif	ave_FC	non_zero_F_cov	nb.genes	Reference		NOTES:
LGb	3271537	7.15753	0.56875	0.9326	62	Alföldi,. J, et al. 2011. Nature. PMID:21881562		ave_cum_dif:	average difference in coverage beteen Female and male (F-M)
GL343282.1	1779868	6.53928	0.5839	0.9137	69	Eckalbar et al. 2013. PMID:23343042 AND Rovatsos,. M. et al. Genetics of Sex. 2014. PMID:25172916		ave_FC:	average of the M/F coverage ratio
GL343338.1	1258094	6.16873	0.59416	0.90199	47	Rovatsos,. M. et al. Genetics of Sex. 2014. PMID:25172916; this sutdy		non_zero_F_cov:	Fraction of the contig that has non-zero coverage in the female
GL343364.1	1083274	8.06217	0.54119	0.94202	17	Rovatsos,. M. et al. Genetics of Sex. 2014. PMID:25172916; this sutdy		nb.genes:	Number of coding genes
GL343423.1	834740	6.65699	0.57582	0.89577	19	Rovatsos,. M. et al. Genetics of Sex. 2014. PMID:25172916; this sutdy			selected contigs have ave_cum_diff >=2
GL343417.1	831895	4.99026	0.66316	0.91344	43	Rovatsos,. M. et al. Genetics of Sex. 2014. PMID:25172916; this sutdy			selected contigs have non_zero_F >=0.5
GL343550.1	526944	6.57863	0.5665	0.74094	14	Rovatsos,. M. et al. Genetics of Sex. 2014. PMID:25172916; this sutdy
GL343913.1	147151	5.25009	0.63075	0.66961	7	Rovatsos,. M. et al. Genetics of Sex. 2014. PMID:25172916; this sutdy
GL343947.1	117443	5.86695	0.71238	0.80409	12	Rovatsos,. M. et al. Genetics of Sex. 2014. PMID:25172916; this sutdy
GL344036.1	91516	6.44666	0.56099	0.76393	4	This study
GL344122.1	78667	6.58003	0.5795	0.75573	3	This study
GL344415.1	36060	5.59032	0.2599	0.79444	0	This study		# genes	%
AAWZ02036333	28450	4.88061	0.69993	0.59155	0	This study	Total number of X-linked genes from genome project and re-annotation	131	41.853
AAWZ02036528	25586	4.5493	0.61434	0.63137	1	This study	Total number of X-linked genes by qPCR	159	50.7987
AAWZ02037154	18708	3.97176	0.74114	0.6631	0	This study	Total number of X-linked added by this study	182	58.147
AAWZ02037172	18526	5.41476	0.62586	0.70811	0	This study	Total	313
AAWZ02037214	18201	4.70931	0.53584	0.7033	1	This study
AAWZ02037375	17015	4.16949	0.73208	0.50588	0	This study		Mb	%
AAWZ02037476	16313	7.22048	0.42846	0.70552	0	This study	Total X-linked Mb from genome project	5.0514	46.5526
AAWZ02037489	16169	4.25843	0.60946	0.6646	0	This study	Total X-linked Mb by qPCR	4.79954	44.2314
GL344983.1	14431	5.57347	0.58646	0.61111	0	This study	Total X-linked Mb added by this study	5.79957	53.4474
AAWZ02037826	14353	2.4738	0.71857	0.78322	0	This study	Total	10.851
AAWZ02037879	14141	5.37158	0.58198	0.9078	0	This study
AAWZ02038075	13153	3.87933	0.66365	0.59542	0	This study
GL345060.1	12621	5.19914	0.71039	0.71429	1	This study
GL345056.1	12365	2.70053	0.51748	0.54472	0	This study
AAWZ02038267	12317	4.19122	0.60688	0.81301	1	This study
AAWZ02038343	12026	6.85047	0.50454	0.68333	1	This study
AAWZ02038405	11792	5.30419	0.6052	0.69231	0	This study
AAWZ02038509	11381	4.53386	0.38006	0.60177	1	This study
AAWZ02038539	11277	2.94489	0.68627	0.91964	0	This study
AAWZ02038589	11127	6.18396	0.0428	0.78378	0	This study
AAWZ02038774	10464	6.62766	0.45095	0.61538	0	This study
AAWZ02038845	10240	4.67469	0.72706	0.89216	1	This study
AAWZ02038884	10138	4.33431	0.66961	0.75248	0	This study
AAWZ02039031	9731	5.62618	0.2291	0.53608	1	This study
AAWZ02039177	9271	3.13278	0.56544	0.69565	0	This study
AAWZ02039215	9171	5.32561	0.63929	0.59341	0	This study
AAWZ02039263	9039	11.719	0.01431	0.73333	0	This study
AAWZ02039267	9017	4.86287	0.33037	0.53333	0	This study
AAWZ02039329	8827	7.14054	0.59096	0.77273	0	This study
AAWZ02039360	8757	4.8588	0.60471	0.87356	0	This study
AAWZ02039391	8704	4.38228	0.73025	0.6092	0	This study
AAWZ02039492	8483	8.60585	0.63537	0.65476	0	This study
AAWZ02039564	8328	9.94252	0.08102	0.60241	0	This study
AAWZ02039581	8293	4.73084	0.68496	0.63415	1	This study
AAWZ02039640	8194	4.38838	0.02856	0.5679	0	This study
AAWZ02039657	8164	7.36808	0.44582	0.59259	0	This study
AAWZ02039671	8137	8.84157	0.47211	0.69136	0	This study
AAWZ02039691	8092	4.7537	0.37925	0.8625	1	This study
AAWZ02039693	8090	3.19281	0.28384	0.525	0	This study
AAWZ02039756	7973	5.21818	0.24289	0.64557	0	This study
AAWZ02039783	7930	5.83961	0.5877	0.64557	0	This study
AAWZ02039842	7812	3.83362	0.38873	0.51282	0	This study
AAWZ02039910	7676	2.98144	0.67166	0.61842	0	This study
AAWZ02039952	7603	8.21577	0.43475	0.68421	0	This study
AAWZ02040004	7530	4.56566	0.39898	0.52	0	This study
AAWZ02040007	7527	5.65941	0.42974	0.93333	0	This study
AAWZ02040040	7481	13.4529	0.03126	0.7027	0	This study
AAWZ02040114	7379	6.18913	0.59919	0.89041	0	This study
AAWZ02040207	7254	3.20631	0.65513	0.63889	0	This study
AAWZ02040208	7253	4.82635	0.34457	0.66667	0	This study
AAWZ02040214	7244	9.1283	0.05806	0.55556	0	This study
AAWZ02040239	7208	6.15497	0.56038	0.54167	0	This study
AAWZ02040250	7185	6.86372	0.53381	0.57746	0	This study
AAWZ02040281	7139	5.9972	0.51086	0.66197	0	This study
AAWZ02040314	7098	3.56543	0.51432	0.71429	0	This study
AAWZ02040353	7049	4.13688	0.68232	0.54286	1	This study
AAWZ02040367	7034	5.36751	0.48005	0.55714	0	This study
AAWZ02040396	7000	4.78039	0.19645	0.64286	1	This study
AAWZ02040463	6924	2.19698	0.66987	0.69565	0	This study
AAWZ02040472	6913	6.37791	0.35012	0.56522	0	This study
AAWZ02040516	6853	7.18227	0.49905	0.66176	0	This study
AAWZ02040524	6840	3.74685	0.74835	0.82353	0	This study
AAWZ02040624	6713	5.04991	0.71244	0.68657	0	This study
AAWZ02040803	6466	4.63966	0.41655	0.64062	0	This study
AAWZ02040897	6360	2.39782	0.68709	0.68254	0	This study
AAWZ02040985	6234	4.36183	0.69252	0.58065	0	This study
AAWZ02041004	6212	12.9986	0.54016	0.56452	0	This study
AAWZ02041032	6185	2.49326	0.59021	0.55738	0	This study
AAWZ02041083	6125	5.56853	0.57275	0.90164	1	This study
AAWZ02041106	6099	8.74226	0.49263	0.55	0	This study
AAWZ02041164	6024	5.12727	0.72698	0.86667	0	This study
AAWZ02041193	5996	5.79723	0.17551	0.84746	0	This study
AAWZ02041209	5975	4.54801	0.41192	0.55932	0	This study
AAWZ02041238	5936	6.64968	0.71819	0.67797	0	This study
AAWZ02041283	5868	3.84495	0.47148	0.89655	0	This study
AAWZ02041299	5850	8.59399	0.47579	0.89655	1	This study
AAWZ02041449	5677	5.86421	0.71339	0.66071	0	This study
AAWZ02041479	5639	4.77762	0.62289	0.83929	0	This study
AAWZ02041481	5635	4.75077	0.55484	0.83929	1	This study
AAWZ02041542	5567	5.48078	0.42178	0.54545	0	This study
AAWZ02041547	5564	5.29079	0.23613	0.63636	0	This study
AAWZ02041559	5538	4.36475	0.03642	0.50909	0	This study
AAWZ02041563	5531	5.99985	0.49073	0.78182	0	This study
AAWZ02041581	5512	18.2604	0.34731	0.90909	1	This study
AAWZ02041615	5465	12.7036	0.07635	0.77778	0	This study
AAWZ02041673	5398	6.55348	0.45978	0.54717	0	This study
AAWZ02041828	5215	3.6734	0.64263	0.96154	0	This study

## Sheet: Supp Table 6
Supplementary Table 6. Detailed information regarding single-cell RNA-seq.
Genomic DNA:
SNPs detected in female autosomes = 2722187
SNPs detected in female autosomal exons = 60409
Total length autosomes = 1078373054
Total exonic length autosomes = 46208328
SNPs per nucleotide position in autosomes = 0.0025
SNPs per exonic position in autosomes = 0.0013
SNPs detected in female X chromosome = 5180
SNPs detected in female X chromosome exons = 205
Total length X chromosome = 9879628
Total exonic length X chromosome = 768880
SNPs per nucleotide position in X chromosome = 0.0005
SNPs per exonic position in X chromosome = 0.0003
Single-cell RNA-Seq:
Chr.type	Tot. SNPs*	Biallelic SNPs**	Proportion
A	4822	1137	0.24
X	22	6	0.27
Chr.type	Tot. SNPs*	Biallelic SNPs***	Proportion
A	4822	1013	0.21
X	22	3	0.14
Chr.type	Tot. Genes w/ SNPs****	Genes w/ biallelic SNPs***	Proportion
A	1400	366	0.26
X	6	1	0.17
*Total number of transcribed heterozygous positions in at least one cell.
**Number of biallelically expressed SNPs: one of the two SNPs is covered by at least one read.
***Number of biallelically expressed SNPs: according to the multiallelic model of bcftools1.
****Total number of genes containing expressed SNPs in at least one cell.
1 https://samtools.github.io/bcftools/call-m.pdf
VCF File (X chromosome):
																						Legend:
#CHROM	POS	ID	REF	ALT	QUAL	FILTER	INFO	FORMAT	ANOF2060716_gDNA_QC_NR.bam				C05	C14	C17	C31	C42	C74				CHROM chromosome: an identifier from the reference genome. All entries for a specific CHROM should form a contiguous block within the VCF file.(Alphanumeric String, Required) POS position: The reference position, with the 1st base having position 1. Positions are sorted numerically, in increasing order, within each reference sequence CHROM. (Integer, Required) ID semi-colon separated list of uniq…
LGb	22122	.	C	G	222	.	.	GT:PL:DP:SP:ADF:ADR:AD	0/1:255,0,255:40:0:9,10:10,11:19,21
LGb	109138	.	C	T	222	.	.	GT:PL:DP:SP:ADF:ADR:AD	0/1:255,0,255:40:1:12,13:6,9:18,22
LGb	142673	.	G	C	159	.	.	GT:PL:DP:SP:ADF:ADR:AD	0/1:192,0,255:21:2:4,2:8,7:12,9				0		0			0
LGb	725628	.	G	A	222	.	.	GT:PL:DP:SP:ADF:ADR:AD	0/1:255,0,255:33:1:9,8:7,9:16,17
LGb	725832	.	C	T	218	.	.	GT:PL:DP:SP:ADF:ADR:AD	0/1:251,0,255:33:0:9,8:9,7:18,15
LGb	982977	.	A	G	151619	.	.	GT:PL:DP:SP:ADF:ADR:AD	0/1:47,0,10:12:3:3,1:3,5:6,6
LGb	983676	.	G	A	219	.	.	GT:PL:DP:SP:ADF:ADR:AD	0/1:252,0,10:22:6:4,10:0,8:4,18
LGb	1279538	.	C	T	202	.	.	GT:PL:DP:SP:ADF:ADR:AD	0/1:235,0,255:28:3:8,7:9,4:17,11
LGb	1279539	.	A	G	207	.	.	GT:PL:DP:SP:ADF:ADR:AD	0/1:240,0,255:29:3:8,8:9,4:17,12
LGb	1279906	.	T	C	222	.	.	GT:PL:DP:SP:ADF:ADR:AD	0/1:255,0,212:27:2:2,5:9,11:11,16
LGb	1288056	.	T	C	389876	.	.	GT:PL:DP:SP:ADF:ADR:AD	0/1:74,0,255:31:2:12,4:10,5:22,9							0
LGb	1288065	.	C	G	362709	.	.	GT:PL:DP:SP:ADF:ADR:AD	0/1:71,0,255:28:2:11,4:8,5:19,9							0
LGb	1370331	.	G	A	222	.	.	GT:PL:DP:SP:ADF:ADR:AD	0/1:255,0,255:38:5:6,15:8,9:14,24
LGb	1370756	.	T	C	222	.	.	GT:PL:DP:SP:ADF:ADR:AD	0/1:255,0,255:38:0:5,8:11,14:16,22
LGb	1371133	.	C	A	222	.	.	GT:PL:DP:SP:ADF:ADR:AD	0/1:255,0,212:29:17:2,11:10,6:12,17
LGb	1371252	.	T	A	125	.	.	GT:PL:DP:SP:ADF:ADR:AD	0/1:158,0,199:17:0:8,6:2,1:10,7
LGb	1371488	.	C	T	222	.	.	GT:PL:DP:SP:ADF:ADR:AD	0/1:255,0,248:35:3:5,11:9,10:14,21							0
LGb	1371553	.	C	T	190	.	.	GT:PL:DP:SP:ADF:ADR:AD	0/1:223,0,255:37:5:16,7:7,7:23,14
LGb	1371590	.	T	G	222	.	.	GT:PL:DP:SP:ADF:ADR:AD	0/1:255,0,255:35:3:11,8:7,9:18,17
LGb	1371749	.	G	A	164	.	.	GT:PL:DP:SP:ADF:ADR:AD	0/1:197,0,255:39:3:9,11:11,8:20,19
LGb	1371761	.	C	T	187	.	.	GT:PL:DP:SP:ADF:ADR:AD	0/1:220,0,255:38:3:8,13:9,8:17,21
LGb	1371827	.	G	T	222	.	.	GT:PL:DP:SP:ADF:ADR:AD	0/1:255,0,255:44:1:9,13:11,11:20,24
LGb	1372004	.	T	C	222	.	.	GT:PL:DP:SP:ADF:ADR:AD	0/1:255,0,255:47:11:8,19:12,8:20,27
LGb	1372312	.	G	A	222	.	.	GT:PL:DP:SP:ADF:ADR:AD	0/1:255,0,255:44:3:10,10:9,15:19,25
LGb	1372486	.	C	T	222	.	.	GT:PL:DP:SP:ADF:ADR:AD	0/1:255,0,255:30:2:8,11:6,5:14,16
LGb	1373152	.	T	A	222	.	.	GT:PL:DP:SP:ADF:ADR:AD	0/1:255,0,255:36:0:8,5:13,10:21,15
LGb	1373191	.	A	T	222	.	.	GT:PL:DP:SP:ADF:ADR:AD	0/1:255,0,255:28:0:5,7:7,9:12,16
LGb	1373217	.	C	T	222	.	.	GT:PL:DP:SP:ADF:ADR:AD	0/1:255,0,221:26:2:4,7:7,8:11,15
LGb	1658878	.	G	C	222	.	.	GT:PL:DP:SP:ADF:ADR:AD	0/1:255,0,255:41:1:9,12:10,10:19,22
LGb	1683498	.	C	T	222	.	.	GT:PL:DP:SP:ADF:ADR:AD	0/1:255,0,255:32:3:7,9:10,6:17,15
LGb	1738312	.	C	A	154151	.	.	GT:PL:DP:SP:ADF:ADR:AD	0/1:49,0,109:37:15:19,1:11,6:30,7
LGb	1739006	.	C	T	222	.	.	GT:PL:DP:SP:ADF:ADR:AD	0/1:255,0,208:31:2:5,8:5,13:10,21
LGb	1754012	.	C	A	196	.	.	GT:PL:DP:SP:ADF:ADR:AD	0/1:229,0,255:35:0:15,9:7,4:22,13
LGb	1758539	.	T	G	222	.	.	GT:PL:DP:SP:ADF:ADR:AD	0/1:255,0,221:28:2:6,9:4,6:10,15
LGb	1758596	.	A	G	222	.	.	GT:PL:DP:SP:ADF:ADR:AD	0/1:255,0,238:31:0:10,11:4,6:14,17
LGb	1759507	.	A	G	193	.	.	GT:PL:DP:SP:ADF:ADR:AD	0/1:226,0,255:32:3:9,7:12,4:21,11
LGb	1759509	.	G	A	166	.	.	GT:PL:DP:SP:ADF:ADR:AD	0/1:199,0,255:31:6:9,7:12,3:21,10
LGb	1799460	.	C	T	222	.	.	GT:PL:DP:SP:ADF:ADR:AD	0/1:255,0,248:27:2:7,10:5,5:12,15
LGb	1899328	.	C	T	222	.	.	GT:PL:DP:SP:ADF:ADR:AD	0/1:255,0,248:28:0:4,6:8,10:12,16
LGb	2081260	.	C	T	222	.	.	GT:PL:DP:SP:ADF:ADR:AD	0/1:255,0,255:36:0:10,15:5,6:15,21
LGb	2339041	.	A	G	222	.	.	GT:PL:DP:SP:ADF:ADR:AD	0/1:255,0,255:36:1:10,8:12,6:22,14
LGb	2358095	.	C	T	194	.	.	GT:PL:DP:SP:ADF:ADR:AD	0/1:227,0,255:26:10:8,3:5,10:13,13
LGb	2358098	.	C	T	221	.	.	GT:PL:DP:SP:ADF:ADR:AD	0/1:254,0,255:27:9:8,4:5,10:13,14
LGb	2415330	.	G	C	222	.	.	GT:PL:DP:SP:ADF:ADR:AD	0/1:255,0,221:34:0:7,13:4,10:11,23
LGb	2721829	.	G	A	222	.	.	GT:PL:DP:SP:ADF:ADR:AD	0/1:255,0,255:36:0:7,7:12,10:19,17
LGb	3234394	.	T	C	140	.	.	GT:PL:DP:SP:ADF:ADR:AD	0/1:175,0,17:20:23:8,2:1,9:9,11
GL343282.1	3574	.	G	A	190	.	.	GT:PL:DP:SP:ADF:ADR:AD	0/1:223,0,255:26:2:8,6:8,4:16,10
GL343282.1	3690	.	G	A	222	.	.	GT:PL:DP:SP:ADF:ADR:AD	0/1:255,0,255:30:1:5,10:7,8:12,18
GL343282.1	14067	.	G	A	222	.	.	GT:PL:DP:SP:ADF:ADR:AD	0/1:255,0,255:27:0:9,8:5,5:14,13
GL343282.1	19389	.	A	G	178	.	.	GT:PL:DP:SP:ADF:ADR:AD	0/1:211,0,255:23:4:8,8:5,2:13,10					1	1	1
GL343282.1	23631	.	C	T	222	.	.	GT:PL:DP:SP:ADF:ADR:AD	0/1:255,0,255:47:0:18,13:9,7:27,20					1	1	0/1 (2 reads 0)
GL343282.1	26027	.	G	A	222	.	.	GT:PL:DP:SP:ADF:ADR:AD	0/1:255,0,255:29:3:4,8:9,8:13,16					1	1	0/1 (1read 0)
GL343282.1	26033	.	G	A	222	.	.	GT:PL:DP:SP:ADF:ADR:AD	0/1:255,0,255:31:3:4,8:10,9:14,17					1	1	0/1 (1read 0)
GL343282.1	112103	.	A	G	222	.	.	GT:PL:DP:SP:ADF:ADR:AD	0/1:255,0,255:39:1:12,10:8,9:20,19
GL343282.1	112126	.	T	C	222	.	.	GT:PL:DP:SP:ADF:ADR:AD	0/1:255,0,255:41:3:10,12:11,8:21,20
GL343282.1	112147	.	G	T	222	.	.	GT:PL:DP:SP:ADF:ADR:AD	0/1:255,0,255:30:1:7,10:7,6:14,16
GL343282.1	113605	.	G	A	222	.	.	GT:PL:DP:SP:ADF:ADR:AD	0/1:255,0,255:47:0:10,17:8,12:18,29
GL343282.1	123820	.	G	A	222	.	.	GT:PL:DP:SP:ADF:ADR:AD	0/1:255,0,255:33:1:11,10:5,7:16,17
GL343282.1	126227	.	A	C	222	.	.	GT:PL:DP:SP:ADF:ADR:AD	0/1:255,0,255:39:3:11,7:10,11:21,18
GL343282.1	174111	.	C	T	222	.	.	GT:PL:DP:SP:ADF:ADR:AD	0/1:255,0,255:31:1:5,10:7,9:12,19
GL343282.1	230915	.	T	C	143	.	.	GT:PL:DP:SP:ADF:ADR:AD	0/1:176,0,189:33:0:10,9:8,6:18,15
GL343282.1	327490	.	C	T	115	.	.	GT:PL:DP:SP:ADF:ADR:AD	0/1:148,0,98:9:4:0,2:4,3:4,5
GL343282.1	328718	.	G	A	222	.	.	GT:PL:DP:SP:ADF:ADR:AD	0/1:255,0,255:32:8:8,11:9,4:17,15
GL343282.1	400539	.	A	G	222	.	.	GT:PL:DP:SP:ADF:ADR:AD	0/1:255,0,202:21:0:5,6:4,6:9,12
GL343282.1	406409	.	C	T	136	.	.	GT:PL:DP:SP:ADF:ADR:AD	0/1:169,0,255:22:0:8,5:6,3:14,8
GL343282.1	406776	.	A	G	222	.	.	GT:PL:DP:SP:ADF:ADR:AD	0/1:255,0,255:28:0:6,5:8,9:14,14
GL343282.1	409163	.	C	T	222	.	.	GT:PL:DP:SP:ADF:ADR:AD	0/1:255,0,225:22:0:5,7:5,5:10,12
GL343282.1	456878	.	G	A	222	.	.	GT:PL:DP:SP:ADF:ADR:AD	0/1:255,0,255:37:3:7,6:16,8:23,14
GL343282.1	504645	.	T	C	167	.	.	GT:PL:DP:SP:ADF:ADR:AD	0/1:200,0,166:26:22:12,7:0,7:12,14
GL343282.1	504750	.	G	A	197	.	.	GT:PL:DP:SP:ADF:ADR:AD	0/1:230,0,255:30:0:9,7:8,6:17,13
GL343282.1	505289	.	A	G	222	.	.	GT:PL:DP:SP:ADF:ADR:AD	0/1:255,0,255:37:7:8,11:12,6:20,17
GL343282.1	505349	.	C	T	219	.	.	GT:PL:DP:SP:ADF:ADR:AD	0/1:252,0,255:40:5:12,10:13,5:25,15
GL343282.1	505424	.	A	G	222	.	.	GT:PL:DP:SP:ADF:ADR:AD	0/1:255,0,255:39:0:10,10:9,10:19,20
GL343282.1	507650	.	G	A	222	.	.	GT:PL:DP:SP:ADF:ADR:AD	0/1:255,0,239:27:2:7,7:5,8:12,15
GL343282.1	507899	.	C	T	170	.	.	GT:PL:DP:SP:ADF:ADR:AD	0/1:203,0,255:22:0:6,4:7,5:13,9
GL343282.1	545761	.	G	A	222	.	.	GT:PL:DP:SP:ADF:ADR:AD	0/1:255,0,255:33:3:9,14:6,4:15,18
GL343282.1	545783	.	G	T	222	.	.	GT:PL:DP:SP:ADF:ADR:AD	0/1:255,0,255:37:8:10,13:10,4:20,17
GL343282.1	546772	.	A	G	222	.	.	GT:PL:DP:SP:ADF:ADR:AD	0/1:255,0,200:28:0:5,7:7,7:12,14
GL343282.1	561140	.	G	A	171	.	.	GT:PL:DP:SP:ADF:ADR:AD	0/1:204,0,255:26:4:6,6:10,4:16,10
GL343282.1	567452	.	G	A	143	.	.	GT:PL:DP:SP:ADF:ADR:AD	0/1:176,0,255:30:14:16,3:5,6:21,9
GL343282.1	567454	.	A	T	165	.	.	GT:PL:DP:SP:ADF:ADR:AD	0/1:198,0,255:29:13:15,3:5,6:20,9
GL343282.1	567637	.	G	A	222	.	.	GT:PL:DP:SP:ADF:ADR:AD	0/1:255,0,255:32:15:5,12:11,4:16,16
GL343282.1	569236	.	A	G	222	.	.	GT:PL:DP:SP:ADF:ADR:AD	0/1:255,0,209:32:0:8,16:3,5:11,21
GL343282.1	569322	.	A	C	222	.	.	GT:PL:DP:SP:ADF:ADR:AD	0/1:255,0,215:27:0:6,10:4,7:10,17
GL343282.1	573523	.	A	C	210	.	.	GT:PL:DP:SP:ADF:ADR:AD	0/1:243,0,255:28:1:8,5:8,7:16,12							1
GL343282.1	573553	.	A	G	152	.	.	GT:PL:DP:SP:ADF:ADR:AD	0/1:185,0,255:24:2:10,4:6,4:16,8							1
GL343282.1	704456	.	G	A	172	.	.	GT:PL:DP:SP:ADF:ADR:AD	0/1:205,0,255:34:0:10,4:14,6:24,10						0		0/1 (~50%)	0
GL343282.1	728759	.	G	A	113	.	.	GT:PL:DP:SP:ADF:ADR:AD	0/1:146,0,130:12:0:2,1:4,5:6,6						0		0/1 (~50%)	0
GL343282.1	728824	.	A	G	86	.	.	GT:PL:DP:SP:ADF:ADR:AD	0/1:119,0,167:10:0:2,2:4,2:6,4						0		0/1 (50%)	0
GL343282.1	739216	.	G	C	222	.	.	GT:PL:DP:SP:ADF:ADR:AD	0/1:255,0,255:37:1:9,8:9,11:18,19
GL343282.1	747771	.	G	A	60	.	.	GT:PL:DP:SP:ADF:ADR:AD	0/1:94,0,255:24:0:9,4:7,4:16,8
GL343282.1	760514	.	A	G	222	.	.	GT:PL:DP:SP:ADF:ADR:AD	0/1:255,0,255:39:5:10,6:10,13:20,19
GL343282.1	760670	.	T	A	207	.	.	GT:PL:DP:SP:ADF:ADR:AD	0/1:240,0,255:29:2:8,4:9,8:17,12
GL343282.1	761023	.	T	G	222	.	.	GT:PL:DP:SP:ADF:ADR:AD	0/1:255,0,255:30:0:8,10:6,6:14,16
GL343282.1	787913	.	C	T	222	.	.	GT:PL:DP:SP:ADF:ADR:AD	0/1:255,0,202:29:2:9,13:2,5:11,18
GL343282.1	790015	.	G	A	199	.	.	GT:PL:DP:SP:ADF:ADR:AD	0/1:232,0,239:25:10:9,5:3,8:12,13
GL343282.1	801368	.	C	T	187	.	.	GT:PL:DP:SP:ADF:ADR:AD	0/1:220,0,255:22:2:7,7:5,3:12,10
GL343282.1	801406	.	A	G	183	.	.	GT:PL:DP:SP:ADF:ADR:AD	0/1:216,0,167:18:2:7,7:1,3:8,10
GL343282.1	801579	.	C	T	222	.	.	GT:PL:DP:SP:ADF:ADR:AD	0/1:255,0,255:35:1:10,9:7,9:17,18
GL343282.1	951271	.	C	T	420881	.	.	GT:PL:DP:SP:ADF:ADR:AD	0/1:75,0,128:14:0:4,3:5,2:9,5
GL343282.1	975660	.	A	T	202	.	.	GT:PL:DP:SP:ADF:ADR:AD	0/1:235,0,255:28:4:6,3:9,10:15,13
GL343282.1	975730	.	G	A	222	.	.	GT:PL:DP:SP:ADF:ADR:AD	0/1:255,0,255:34:0:8,12:6,8:14,20
GL343282.1	975960	.	G	T	222	.	.	GT:PL:DP:SP:ADF:ADR:AD	0/1:255,0,255:44:1:15,8:12,9:27,17
GL343282.1	979686	.	G	A	222	.	.	GT:PL:DP:SP:ADF:ADR:AD	0/1:255,0,255:35:5:8,6:8,13:16,19
GL343282.1	1243463	.	A	G	197	.	.	GT:PL:DP:SP:ADF:ADR:AD	0/1:230,0,255:25:0:7,4:8,6:15,10
GL343282.1	1261072	.	G	A	213	.	.	GT:PL:DP:SP:ADF:ADR:AD	0/1:246,0,121:21:0:1,2:5,13:6,15
GL343282.1	1261454	.	A	G	156	.	.	GT:PL:DP:SP:ADF:ADR:AD	0/1:189,0,214:30:0:17,11:1,1:18,12
GL343282.1	1261541	.	G	A	222	.	.	GT:PL:DP:SP:ADF:ADR:AD	0/1:255,0,255:41:5:19,12:4,6:23,18
GL343282.1	1276148	.	T	C	222	.	.	GT:PL:DP:SP:ADF:ADR:AD	0/1:255,0,255:37:14:17,7:4,9:21,16
GL343282.1	1277768	.	A	T	222	.	.	GT:PL:DP:SP:ADF:ADR:AD	0/1:255,0,255:40:0:14,12:8,6:22,18
GL343282.1	1277819	.	C	T	222	.	.	GT:PL:DP:SP:ADF:ADR:AD	0/1:255,0,255:37:5:12,7:8,10:20,17
GL343282.1	1423027	.	C	T	222	.	.	GT:PL:DP:SP:ADF:ADR:AD	0/1:255,0,204:32:3:7,10:4,11:11,21
GL343282.1	1447465	.	C	T	222	.	.	GT:PL:DP:SP:ADF:ADR:AD	0/1:255,0,239:34:1:4,9:8,13:12,22
GL343282.1	1463796	.	T	G	222	.	.	GT:PL:DP:SP:ADF:ADR:AD	0/1:255,0,255:46:1:11,12:13,10:24,22
GL343282.1	1464187	.	C	A	178	.	.	GT:PL:DP:SP:ADF:ADR:AD	0/1:211,0,255:25:13:4,7:11,3:15,10
GL343282.1	1578080	.	G	A	202	.	.	GT:PL:DP:SP:ADF:ADR:AD	0/1:235,0,255:26:0:6,5:9,6:15,11
GL343282.1	1578114	.	G	A	222	.	.	GT:PL:DP:SP:ADF:ADR:AD	0/1:255,0,255:32:0:6,7:9,10:15,17
GL343338.1	263372	.	G	A	222	.	.	GT:PL:DP:SP:ADF:ADR:AD	0/1:255,0,255:36:5:6,9:13,8:19,17
GL343338.1	263801	.	G	A	222	.	.	GT:PL:DP:SP:ADF:ADR:AD	0/1:255,0,255:38:1:7,9:11,11:18,20
GL343338.1	267722	.	G	A	75	.	.	GT:PL:DP:SP:ADF:ADR:AD	0/1:108,0,241:18:3:3,0:9,6:12,6					1
GL343338.1	411187	.	C	T	302527	.	.	GT:PL:DP:SP:ADF:ADR:AD	0/1:63,0,83:5:0:0,1:3,1:3,2
GL343338.1	486826	.	G	A	184	.	.	GT:PL:DP:SP:ADF:ADR:AD	0/1:217,0,255:23:2:9,6:4,4:13,10
GL343338.1	487897	.	G	T	222	.	.	GT:PL:DP:SP:ADF:ADR:AD	0/1:255,0,236:36:1:5,13:7,11:12,24
GL343338.1	487899	.	G	T	222	.	.	GT:PL:DP:SP:ADF:ADR:AD	0/1:255,0,248:36:0:7,13:6,10:13,23
GL343338.1	514185	.	A	G	222	.	.	GT:PL:DP:SP:ADF:ADR:AD	0/1:255,0,255:28:9:9,4:5,10:14,14
GL343338.1	515291	.	C	T	222	.	.	GT:PL:DP:SP:ADF:ADR:AD	0/1:255,0,255:32:1:8,10:5,9:13,19
GL343338.1	518903	.	C	T	222	.	.	GT:PL:DP:SP:ADF:ADR:AD	0/1:255,0,252:30:5:10,8:4,8:14,16
GL343338.1	521707	.	T	C	146	.	.	GT:PL:DP:SP:ADF:ADR:AD	0/1:179,0,255:25:2:11,5:5,4:16,9
GL343338.1	527515	.	G	A	128	.	.	GT:PL:DP:SP:ADF:ADR:AD	0/1:161,0,253:21:12:5,8:7,1:12,9
GL343338.1	527527	.	C	T	134	.	.	GT:PL:DP:SP:ADF:ADR:AD	0/1:167,0,255:24:15:6,9:8,1:14,10
GL343338.1	534496	.	C	T	128	.	.	GT:PL:DP:SP:ADF:ADR:AD	0/1:162,0,255:37:3:14,6:14,3:28,9
GL343338.1	878846	.	G	A	171	.	.	GT:PL:DP:SP:ADF:ADR:AD	0/1:204,0,255:31:0:11,6:10,4:21,10						0
GL343338.1	885019	.	G	A	222	.	.	GT:PL:DP:SP:ADF:ADR:AD	0/1:255,0,228:29:6:9,8:3,9:12,17						0
GL343338.1	885081	.	C	T	222	.	.	GT:PL:DP:SP:ADF:ADR:AD	0/1:255,0,255:27:6:6,10:7,4:13,14						1
GL343338.1	885154	.	C	T	222	.	.	GT:PL:DP:SP:ADF:ADR:AD	0/1:255,0,255:30:2:11,8:5,6:16,14
GL343338.1	885170	.	G	A	222	.	.	GT:PL:DP:SP:ADF:ADR:AD	0/1:255,0,246:23:2:7,6:4,6:11,12
GL343338.1	885279	.	T	C	222	.	.	GT:PL:DP:SP:ADF:ADR:AD	0/1:255,0,255:36:1:8,10:10,8:18,18
GL343338.1	885305	.	C	A	222	.	.	GT:PL:DP:SP:ADF:ADR:AD	0/1:255,0,255:35:3:7,10:10,8:17,18
GL343338.1	916913	.	T	C	107	.	.	GT:PL:DP:SP:ADF:ADR:AD	0/1:140,0,117:19:0:2,4:6,6:8,10
GL343338.1	1026168	.	T	C	222	.	.	GT:PL:DP:SP:ADF:ADR:AD	0/1:255,0,187:28:2:7,11:3,7:10,18
GL343338.1	1026169	.	G	A	222	.	.	GT:PL:DP:SP:ADF:ADR:AD	0/1:255,0,238:29:2:9,9:4,7:13,16
GL343364.1	138681	.	C	T	222	.	.	GT:PL:DP:SP:ADF:ADR:AD	0/1:255,0,255:41:7:17,7:8,9:25,16
GL343364.1	255304	.	A	G	222	.	.	GT:PL:DP:SP:ADF:ADR:AD	0/1:255,0,255:96:0:22,38:13,23:35,61
GL343364.1	262265	.	C	T	113	.	.	GT:PL:DP:SP:ADF:ADR:AD	0/1:146,0,90:9:0:1,1:2,5:3,6
GL343364.1	778623	.	A	C	222	.	.	GT:PL:DP:SP:ADF:ADR:AD	0/1:255,0,255:41:1:8,15:8,10:16,25
GL343423.1	112103	.	G	A	214	.	.	GT:PL:DP:SP:ADF:ADR:AD	0/1:247,0,255:33:1:12,10:7,4:19,14
GL343423.1	208813	.	T	A	116	.	.	GT:PL:DP:SP:ADF:ADR:AD	0/1:149,0,238:21:18:12,2:2,5:14,7
GL343423.1	211252	.	A	T	146	.	.	GT:PL:DP:SP:ADF:ADR:AD	0/1:179,0,231:20:0:6,4:5,5:11,9
GL343423.1	226982	.	T	A	199	.	.	GT:PL:DP:SP:ADF:ADR:AD	0/1:232,0,255:24:2:8,8:5,3:13,11
GL343423.1	283810	.	T	C	222	.	.	GT:PL:DP:SP:ADF:ADR:AD	0/1:255,0,255:39:5:8,12:11,8:19,20
GL343423.1	702123	.	C	T	193	.	.	GT:PL:DP:SP:ADF:ADR:AD	0/1:226,0,255:24:4:5,7:8,4:13,11
GL343423.1	702297	.	G	A	222	.	.	GT:PL:DP:SP:ADF:ADR:AD	0/1:255,0,255:37:0:10,12:6,9:16,21
GL343423.1	815540	.	A	G	168	.	.	GT:PL:DP:SP:ADF:ADR:AD	0/1:201,0,255:22:2:4,2:8,8:12,10
GL343423.1	815923	.	A	G	222	.	.	GT:PL:DP:SP:ADF:ADR:AD	0/1:255,0,255:32:3:8,8:11,5:19,13
GL343423.1	815967	.	A	C	222	.	.	GT:PL:DP:SP:ADF:ADR:AD	0/1:255,0,255:35:0:10,9:9,7:19,16
GL343417.1	13881	.	C	G	275915	.	.	GT:PL:DP:SP:ADF:ADR:AD	0/1:62,0,249:27:0:12,3:10,2:22,5
GL343417.1	13883	.	A	C	346543	.	.	GT:PL:DP:SP:ADF:ADR:AD	0/1:69,0,255:28:0:12,3:10,3:22,6
GL343417.1	13884	.	G	A	347033	.	.	GT:PL:DP:SP:ADF:ADR:AD	0/1:68,0,14:5:0:1,1:0,3:1,4			INDEL
GL343417.1	25272	.	C	T	222	.	.	GT:PL:DP:SP:ADF:ADR:AD	0/1:255,0,255:31:3:9,7:6,9:15,16
GL343417.1	128488	.	C	T	222	.	.	GT:PL:DP:SP:ADF:ADR:AD	0/1:255,0,255:32:0:7,8:8,9:15,17
GL343417.1	142815	.	C	T	222	.	.	GT:PL:DP:SP:ADF:ADR:AD	0/1:255,0,255:29:3:7,6:6,10:13,16
GL343417.1	175843	.	G	A	222	.	.	GT:PL:DP:SP:ADF:ADR:AD	0/1:255,0,180:31:2:5,9:4,13:9,22
GL343417.1	181194	.	C	T	227706	.	.	GT:PL:DP:SP:ADF:ADR:AD	0/1:56,0,25:62:4:3,6:11,42:14,48
GL343417.1	184378	.	G	A	199	.	.	GT:PL:DP:SP:ADF:ADR:AD	0/1:232,0,255:25:2:7,5:6,7:13,12
GL343417.1	230254	.	T	A	150	.	.	GT:PL:DP:SP:ADF:ADR:AD	0/1:183,0,179:16:6:8,4:1,3:9,7
GL343417.1	360254	.	C	T	170	.	.	GT:PL:DP:SP:ADF:ADR:AD	0/1:203,0,177:18:8:4,2:3,9:7,11
GL343417.1	378787	.	C	T	220	.	.	GT:PL:DP:SP:ADF:ADR:AD	0/1:253,0,251:27:0:9,10:4,4:13,14
GL343550.1	40303	.	C	T	188	.	.	GT:PL:DP:SP:ADF:ADR:AD	0/1:221,0,255:29:9:14,5:4,6:18,11
GL343550.1	44386	.	G	A	222	.	.	GT:PL:DP:SP:ADF:ADR:AD	0/1:255,0,255:53:0:19,14:12,8:31,22
GL343550.1	296602	.	C	T	222	.	.	GT:PL:DP:SP:ADF:ADR:AD	0/1:255,0,255:41:3:15,7:11,8:26,15
GL343550.1	299214	.	T	C	222	.	.	GT:PL:DP:SP:ADF:ADR:AD	0/1:255,0,255:30:0:10,9:5,6:15,15
GL343550.1	299309	.	C	T	167	.	.	GT:PL:DP:SP:ADF:ADR:AD	0/1:200,0,255:29:0:11,6:8,4:19,10
GL343550.1	299322	.	C	G	222	.	.	GT:PL:DP:SP:ADF:ADR:AD	0/1:255,0,247:31:1:8,9:5,9:13,18
GL343550.1	299589	.	G	C	222	.	.	GT:PL:DP:SP:ADF:ADR:AD	0/1:255,0,221:30:0:5,11:5,9:10,20
GL343550.1	299654	.	G	A	205	.	.	GT:PL:DP:SP:ADF:ADR:AD	0/1:238,0,255:27:4:7,8:8,4:15,12
GL343550.1	299751	.	T	C	222	.	.	GT:PL:DP:SP:ADF:ADR:AD	0/1:255,0,242:26:3:8,7:4,7:12,14
GL343550.1	300472	.	T	C	194	.	.	GT:PL:DP:SP:ADF:ADR:AD	0/1:227,0,166:17:5:7,5:1,4:8,9
GL343550.1	300555	.	G	A	222	.	.	GT:PL:DP:SP:ADF:ADR:AD	0/1:255,0,255:34:1:10,13:6,5:16,18
GL343550.1	304570	.	A	G	222	.	.	GT:PL:DP:SP:ADF:ADR:AD	0/1:255,0,185:23:2:4,5:4,10:8,15
GL343550.1	305034	.	C	G	216	.	.	GT:PL:DP:SP:ADF:ADR:AD	0/1:249,0,255:23:2:6,4:6,7:12,11
GL343550.1	313171	.	T	C	222	.	.	GT:PL:DP:SP:ADF:ADR:AD	0/1:255,0,248:30:0:6,7:7,10:13,17
GL343550.1	313806	.	G	A	222	.	.	GT:PL:DP:SP:ADF:ADR:AD	0/1:255,0,255:32:1:7,9:9,7:16,16
GL343550.1	317168	.	T	C	222	.	.	GT:PL:DP:SP:ADF:ADR:AD	0/1:255,0,255:50:4:12,17:12,9:24,26
GL343550.1	317973	.	G	A	222	.	.	GT:PL:DP:SP:ADF:ADR:AD	0/1:255,0,255:36:0:10,11:8,7:18,18
GL343550.1	323024	.	T	A	139	.	.	GT:PL:DP:SP:ADF:ADR:AD	0/1:172,0,146:16:16:8,3:0,5:8,8
GL343550.1	359362	.	C	T	222	.	.	GT:PL:DP:SP:ADF:ADR:AD	0/1:255,0,117:19:8:1,7:5,6:6,13
GL343550.1	452540	.	A	C	170	.	.	GT:PL:DP:SP:ADF:ADR:AD	0/1:203,0,255:36:0:15,6:10,5:25,11
GL343550.1	457103	.	C	T	222	.	.	GT:PL:DP:SP:ADF:ADR:AD	0/1:255,0,255:33:11:4,12:10,7:14,19
GL343550.1	461806	.	C	T	222	.	.	GT:PL:DP:SP:ADF:ADR:AD	0/1:255,0,255:27:2:6,9:6,6:12,15
GL343550.1	462154	.	G	A	134	.	.	GT:PL:DP:SP:ADF:ADR:AD	0/1:167,0,255:20:7:5,6:7,2:12,8
GL343550.1	477442	.	G	A	222	.	.	GT:PL:DP:SP:ADF:ADR:AD	0/1:255,0,238:28:0:10,11:3,4:13,15
GL343550.1	479334	.	C	T	222	.	.	GT:PL:DP:SP:ADF:ADR:AD	0/1:255,0,255:35:0:9,8:9,9:18,17
GL343913.1	15156	.	C	G	233473	.	.	GT:PL:DP:SP:ADF:ADR:AD	0/1:58,0,255:56:27:21,3:15,17:36,20
GL343947.1	2644	.	C	T	222	.	.	GT:PL:DP:SP:ADF:ADR:AD	0/1:255,0,220:27:6:4,11:6,6:10,17
GL343947.1	17262	.	C	T	123	.	.	GT:PL:DP:SP:ADF:ADR:AD	0/1:156,0,241:19:0:4,3:8,4:12,7
GL343947.1	34998	.	C	T	222	.	.	GT:PL:DP:SP:ADF:ADR:AD	0/1:255,0,231:35:5:4,13:8,10:12,23
GL343947.1	63101	.	G	A	222	.	.	GT:PL:DP:SP:ADF:ADR:AD	0/1:255,0,255:27:0:6,6:7,8:13,14
GL343947.1	77661	.	C	T	105	.	.	GT:PL:DP:SP:ADF:ADR:AD	0/1:138,0,255:18:2:7,5:5,1:12,6
GL343947.1	90844	.	G	A	222	.	.	GT:PL:DP:SP:ADF:ADR:AD	0/1:255,0,255:37:1:8,7:10,12:18,19
AAWZ02038845	254	.	T	C	222	.	.	GT:PL:DP:SP:ADF:ADR:AD	0/1:255,0,255:34:0:13,11:5,5:18,16
AAWZ02038845	360	.	G	A	222	.	.	GT:PL:DP:SP:ADF:ADR:AD	0/1:255,0,255:45:9:14,6:11,14:25,20
AAWZ02038845	604	.	T	C	100	.	.	GT:PL:DP:SP:ADF:ADR:AD	0/1:133,0,243:17:0:4,2:7,4:11,6
AAWZ02041083	699	.	T	C	222	.	.	GT:PL:DP:SP:ADF:ADR:AD	0/1:255,0,255:38:5:5,12:10,11:15,23								0
AAWZ02041083	4691	.	G	T	161	.	.	GT:PL:DP:SP:ADF:ADR:AD	0/1:194,0,255:30:10:11,12:6,1:17,13								1
AAWZ02041083	5793	.	G	A	787488	.	.	GT:PL:DP:SP:ADF:ADR:AD	0/1:40,0,129:32:0:6,7:8,11:14,18
