# Supplementary figures and images for: Convergent origination of a Drosophila-like dosage compensation mechanism in a reptile lineage
Source: PubMed Central journal article supplement — Genome Res. 2017 Dec;27(12):1974–87. doi: 10.1101/gr.223727.117 (PMC5741051; doi:10.1101/gr.223727.117), 2017-12

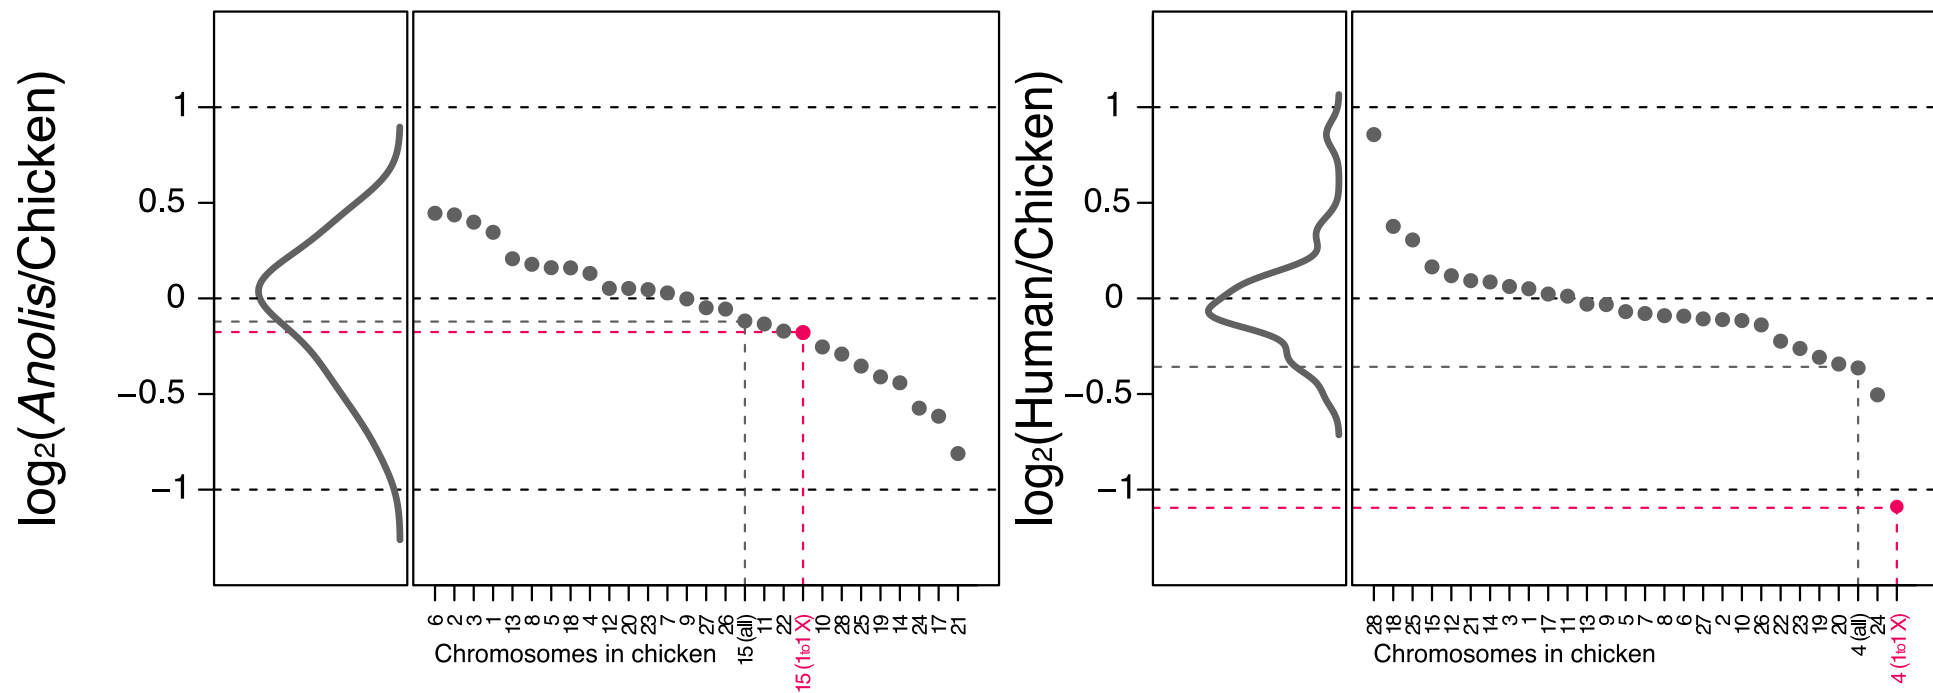

Supplemental Figure S8. Figure 3C with the complete list of used autosomes on the X axis.

Supplement: supp_gr.223727.117_Supplemental_Fig_S8.pdf [file supp_gr.223727.117_Supplemental_Fig_S8.pdf]
